# Supplementary material for: Legislative, educational, policy and other interventions targeting physicians’ interaction with pharmaceutical companies: a systematic review
Source: PubMed Central journal article supplement — BMJ Open. 2014 Jul 1;4(7):e004880. doi: 10.1136/bmjopen-2014-004880 (PMC4091460; doi:10.1136/bmjopen-2014-004880), 2014-07-01
Supplement: bmjopen-2014-004880.draft_revisions.pdf [file bmjopen-2014-004880.draft_revisions.pdf]

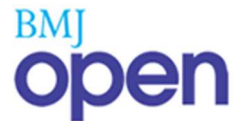

**Interventions targeting physicians' interaction with pharmaceutical companies: A systematic review**

|                                 |                                                                                                                                                                                                                                                                                                                                                                                                                                                                                              |
|---------------------------------|----------------------------------------------------------------------------------------------------------------------------------------------------------------------------------------------------------------------------------------------------------------------------------------------------------------------------------------------------------------------------------------------------------------------------------------------------------------------------------------------|
| Journal:                        | <i>BMJ Open</i>                                                                                                                                                                                                                                                                                                                                                                                                                                                                              |
| Manuscript ID:                  | bmjopen-2014-004880                                                                                                                                                                                                                                                                                                                                                                                                                                                                          |
| Article Type:                   | Research                                                                                                                                                                                                                                                                                                                                                                                                                                                                                     |
| Date Submitted by the Author:   | 17-Jan-2014                                                                                                                                                                                                                                                                                                                                                                                                                                                                                  |
| Complete List of Authors:       | Akl, Elie<br>Alkhaled, Lina; Faculty of Medicine, American University of Beirut, Department of Pediatrics and Adolescent Medicine<br>Kahale, Lara; Faculty of Health Sciences, American University of Beirut, Department of Epidemiology and Population Health<br>Nas, Hala; Faculty of Medicine, University of Damascus,<br>Brax, Hneine; Faculty of Medicine, Université Saint Joseph,<br>Badr, Kamal; Faculty of Medicine, American University of Beirut, Department of Internal Medicine |
| <b>Primary Subject Heading</b>: | Health services research                                                                                                                                                                                                                                                                                                                                                                                                                                                                     |
| Secondary Subject Heading:      | Health policy                                                                                                                                                                                                                                                                                                                                                                                                                                                                                |
| Keywords:                       | Pharma, Gift giving, Conflict of interest, Drug industry, Primary care , Physician                                                                                                                                                                                                                                                                                                                                                                                                           |
|                                 |                                                                                                                                                                                                                                                                                                                                                                                                                                                                                              |

SCHOLARONE™  
Manuscripts

only

1  
2  
3  
4  
5  
6  
7  
8  
9  
10  
11  
12  
13  
14  
15  
16  
17  
18  
19  
20  
21  
22  
23  
24  
25  
26  
27  
28  
29  
30  
31  
32  
33  
34  
35  
36  
37  
38  
39  
40  
41  
42  
43  
44  
45  
46  
47  
48  
49  
50  
51  
52  
53  
54  
55  
56  
57  
58  
59  
60

## Interventions targeting physicians' interaction with pharmaceutical companies: A systematic review

**Co – authors:** Lina Alkhaled<sup>1</sup>, MD; Lara Kahale<sup>2</sup>; Hala Nas<sup>3</sup>, MD; Hneine Brax<sup>4</sup>, MD; Kamal Badr<sup>5</sup>, MD.

**Corresponding author:** Elie A. Akl<sup>5,6,7</sup> MD.

*AUBMC Department of Internal Medicine P.O. Box: 11-0236*

*Riad-El-Solh Beirut 1107 2020*

*Beirut – Lebanon*

*Phone: ++ 00961 1 374374*

[ea32@aub.edu.lb](mailto:ea32@aub.edu.lb)

*<sup>1</sup>Department of Pediatrics and Adolescent Medicine, Faculty of Medicine, American University of Beirut, Beirut, Lebanon*

*<sup>2</sup>Department of Epidemiology and Population Health, Faculty of Health Sciences, American University of Beirut, Beirut, Lebanon*

*<sup>3</sup>Faculty of Medicine, University of Damascus, Damascus, Syria*

*<sup>4</sup> Faculty of Medicine, Université Saint Joseph, Beirut, Lebanon*

*<sup>5</sup>Department of Internal Medicine, American University of Beirut, Beirut, Lebanon*

*<sup>6</sup>Department of Clinical Epidemiology and Biostatistics, McMaster University, Hamilton, ON, Canada.*

*<sup>7</sup>Department of Medicine, State University of New York at Buffalo, Buffalo, NY, USA*

## ABSTRACT

### Background

Pharmaceutical company representatives likely influence the prescribing habits and professional behavior of physicians. The objective of this study was to systematically review the effects of interventions targeting physicians' interactions with pharmaceutical companies.

### Methods

We used the Cochrane approach to systematic review. The search strategy included an electronic search of MEDLINE and EMBASE. Two reviewers completed in duplicate and independently study selection, data abstraction, and assessment of risk of bias. We assessed the quality of evidence by outcome using the GRADE methodology.

### Results

Of 10,189 identified citations, one randomized clinical trial and three observational studies met the eligibility criteria. The RCT provided moderate quality evidence of no effect of a "collaborative approach" between the pharmaceutical industry and the health authority. The three observational studies provided low quality evidence suggesting a positive effect of policies aiming to reduce interaction between physicians and the pharmaceutical companies (in the form of free samples, promotional material, and meeting with pharmaceutical company representatives) on prescription behavior.

### Conclusion

Available evidence suggests a potential impact of policies aiming to reduce interaction between physicians and the pharmaceutical companies on physicians' prescription behavior.

## ARTICLE SUMMARY: STRENGTHS AND LIMITATIONS OF THIS STUDY

### Strengths

- We conducted the systematic review using the Cochrane Collaboration methodology.
- This is the first systematic review to focus on interventions targeting practicing physicians.

### Limitations:

- We identified a limited number of studies to allow strong conclusions.
- The included studies suffered from risk of bias related mostly to the lack of validity of outcome measurement, and the inadequate handling of significant potential confounders.

## INTRODUCTION

Physicians may benefit from the relationship with pharmaceutical industry through access to information on new medications and products. However, the direct financial rewards provided to them could be used to persuade them to prescribe newer and more expensive drugs to patients. [1]

Drug industry also promotes its products through supporting continuing medical education. There is also a concern that by paying for the doctors' continuing education, drug companies makes sure physicians learn what is important for the corporate bottom line.[2]

As a result to these concerns, legislators have tried to improve the transparency of the relationships between doctors and drug companies. [3] For example, the Physician Payments Sunshine Act (Sunshine Act) in the United States requires manufacturers of drugs, medical devices and biologicals participating in federal health care programs to report certain payments and items of value given to physicians and teaching hospitals.[4]

1  
2  
3 There have been also training programs to help restrict physicians' interactions with the  
4 pharmaceutical companies.<sup>[5]</sup> The purpose of these programs is to help physicians better  
5 understand the conflicts of interest associated with the acceptance of gifts and other financial  
6 incentives and their potential effect on patient care.  
7  
8  
9  
10  
11

12  
13  
14  
15 The objective of this study was to systematically review the effects of interventions targeting  
16 physicians' interactions with pharmaceutical companies.  
17  
18  
19  
20

## 21 22 **METHODS**

### 23 24 **Protocol and registration**

25  
26 Protocol was not registered.  
27  
28  
29  
30  
31

### 32 33 **Eligibility criteria**

34  
35 The eligibility criteria were:

- 36  
37 • Types of studies: observational studies (e.g., cohort), non-randomized controlled trials, and  
38 randomized controlled trails.  
39
- 40  
41 • Types of participants: practicing physicians; we did not consider medical students,  
42 physicians in training, or other health professionals.  
43  
44
- 45  
46 • Types of interventions: legislative, educational, policy, or other interventions targeting the  
47 interaction between physicians and drug representatives;  
48  
49
- 50  
51 • Types of outcomes: knowledge of physicians (e.g., about the potential effect of interactions  
52 on physician prescribing behavior); attitude of physicians (e.g. toward the usefulness of  
53  
54  
55  
56  
57  
58  
59  
60

1  
2  
3 information from pharmaceutical company representatives); behavior of physicians (e.g.,  
4  
5 prescription behavior, the rate of contact with pharmaceutical company representatives).  
6  
7  
8  
9

10 We did not exclude studies based on date of publication, but excluded studies not published in  
11  
12 English.  
13

### 14 15 16 17 **Search Strategy**

18  
19 We designed the search strategy with the help of a medical librarian (Appendix 1). The strategy  
20  
21 included searching MEDLINE and EMBASE electronic databases using the OVID interface in  
22  
23 September 2012. The search combined terms for physicians, and pharmaceutical, and included  
24  
25 both free text words and medical subject heading. We did not use any search filter. The appendix  
26  
27 provides the full details of the search strategies. Additional search strategies included search of the  
28  
29 grey literature (theses and dissertations). Also, we reviewed the references lists of included and  
30  
31 relevant papers.  
32  
33  
34  
35  
36  
37  
38

### 39 **Selection of studies**

40  
41 Two reviewers screened in duplicate and independently the titles and abstracts of identified  
42  
43 citations for potential eligibility. We obtained the full text for citations judged as potentially eligible  
44  
45 by at least one of the 2 reviewers. The two reviewers then screened in duplicate and independently  
46  
47 the full texts for eligibility. They used a standardized and pilot tested screening form and resolved  
48  
49 disagreement by discussion.  
50  
51  
52  
53  
54

### 55 **Data collection**

56  
57  
58  
59  
60

1  
2  
3 Two reviewers abstracted in duplicate and independently data from eligible studies. They used a  
4 standardized and pilot tested screening form and detailed written instructions. They resolved  
5 disagreement by discussion. We calculated the agreement between the two authors for the  
6 assessment of trial eligibility using kappa statistic. The data abstracted included the type of study;  
7 the funding source; the characteristics of the population, exposure, and control; the outcomes  
8 assessed; and statistical data.  
9

### 20 **Assessment of risk of bias in included studies**

21  
22 Two reviewers assessed in duplicate and independently the risk of bias in each eligible study. They  
23 resolved disagreements by discussion or with the help of a third reviewer. According to  
24 recommendations outlined in the Cochrane Handbook, we used the following criteria for assessing  
25 the risk of bias in randomized studies:  
26  
27  
28  
29

- 30 • Inadequate sequence generation;
- 31 • Inadequate allocation concealment;
- 32 • Lack of blinding of participants, providers, data collectors, outcome adjudicators, and data  
33 analysts
- 34 • Incompleteness of outcome data.
- 35 • Selective outcome reporting, and other bias.

36  
37 We used the following criteria for assessing the risk of bias in non-randomized studies:  
38  
39

- 40 • Failure to develop and apply appropriate eligibility criteria (e.g., under- or over-matching in  
41 case-control studies, selection of exposed and unexposed in cohort studies from different  
42 populations)
- 43 • Flawed measurement of both exposure and outcome (e.g., differences in measurement of  
44  
45  
46  
47  
48  
49  
50  
51  
52  
53  
54  
55  
56  
57  
58  
59  
60

1  
2  
3 exposure such as recall bias in case-control studies, differential surveillance for outcome in  
4  
5 exposed and unexposed in cohort studies  
6

- 7
- 8 • Failure to adequately control confounding (e.g., failure to accurately measure all known  
9 prognostic factors, failure to match for prognostic factors and/or adjustment in statistical  
10 analysis  
11
- 12 • Incomplete follow-up  
13  
14  
15  
16

17 We graded each potential source of bias as high, low or unclear risk of bias.  
18  
19

## 20 21 22 **Data Analysis and Synthesis** 23

24 We assessed the agreement between reviewers for full text screening by calculating the kappa  
25 statistic. We did not conduct a meta-analysis due to the heterogeneity of study design, types of  
26 interventions, outcomes assessed, and outcome measures used. Instead, we summarized the data  
27 in a narrative way.  
28  
29  
30  
31  
32

## 33 34 35 36 37 **RESULTS** 38

### 39 **Description of included studies** 40

41 Figure 1 shows the study flow. Of the 10,189 identified articles, three observational studies and  
42 one randomized trial met our inclusion criteria. The value of kappa statistic for full text screening  
43 was 0.893, reflecting high levels of agreement.  
44  
45  
46  
47  
48

49  
50  
51 Tables 1 and 2 show the characteristics of the included studies. These studies were conducted in  
52 Warwickshire in the United Kingdom, central Oregon in the United States, Brisbane in Australia,  
53 and Southeastern of the United States. Three studies evaluated the effects of the implementation  
54  
55  
56  
57  
58  
59  
60



1  
2  
3 of new legislations and regulatory policies [6-8] while one study evaluated the effects of various  
4  
5 educational interventions. [9] These studies assessed the impact of interventions on physician  
6  
7 knowledge, attitudes and behavior. The sample sizes in these studies also varied from 14 to 79.  
8  
9

10  
11  
12 Table 3 shows the assessment of the risk of bias in the one included RCT. The risk of bias was  
13  
14 judged to be either low or unclear for the different criteria assessed. [9] Table 4 shows the  
15  
16 assessment of the risk of bias in the three included observational studies. [6-8] We judged the risk of  
17  
18 bias associated with the exposure measurement and the completeness of data as low for all  
19  
20 included studies. We judged the risk of bias as either low or unclear for the remaining  
21  
22 methodological features, except for confounding which we judged as high risk for one study. [7]  
23  
24  
25  
26  
27  
28

### 29 **Effects of implementing new policies**

30  
31 As mentioned previously, one trial and three observational studies evaluated the effects of program  
32  
33 or organizational policies that limit contact between physicians and pharmaceutical company  
34  
35 representatives.  
36  
37  
38  
39

40  
41 Freemantle et al, [9] conducted a randomized controlled trial where both the intervention and the  
42  
43 control groups received practice guidelines, routine marketing act, and a routine health authority  
44  
45 advice. In addition, the interventional group received post-graduate educational allowance  
46  
47 accreditation and a letter from the pharmaceutical advisor asking the practice to “agree to see the  
48  
49 representative preceded approaches by company representatives to specific practices”. The  
50  
51 objective was to assess the “additional benefits from a collaborative approach” between the  
52  
53 pharmaceutical industry and the health authority. Prescribing in both groups “moved towards that  
54  
55  
56  
57  
58  
59  
60

1  
2  
3 recommended by the guidelines". However, the proportion of prescriptions in line with the  
4  
5 guidelines and the overall cost were not different between the two groups.  
6  
7

8  
9  
10 Boltri et al. [6] conducted a retrospective cohort study of a new policy prohibiting drug samples  
11  
12 distribution (mainly hypertensive drugs). Participants included 24 family practice residents and 8  
13  
14 clinical attending physicians at an outpatient clinic in the southeastern United States. At six months  
15  
16 after the new policy implementation, prescription of first-line medication increased from 38% to  
17  
18 61% (odds ratio (OR)=2.73, 95% CI=1.29, 5.76)  
19  
20  
21

22  
23  
24 Spurling et al. [7] examined a cohort of 14 participants, 3 months prior and 9 months after the  
25  
26 implementation of a new policy that included: reception staff not making appointments for  
27  
28 pharmaceutical sales representatives nor accepting promotional material; pharmaceutical sales  
29  
30 representatives not accessing sample cupboards; and general practitioners wishing to see  
31  
32 pharmaceutical sales representatives may do so outside consulting hours.  
33  
34  
35

36  
37  
38 The investigators found that the number of overall promotional material were reduced by 32% and  
39  
40 21% at 3 and 9 months respectively post-intervention compared to pre-intervention. The number of  
41  
42 samples was reduced by 59%, and 70% at 3 and 9 months respectively post-intervention  
43  
44 compared to pre-intervention. The number of prescriptions per patient encounter fell from 0.99 pre-  
45  
46 intervention to 0.92 and 0.54 at 3 and 9 months post-intervention respectively. The number of  
47  
48 generic prescriptions increased from 4% pre-intervention to 8.6% and 8.1% after 3 and 9 months  
49  
50 post-intervention, respectively.  
51  
52  
53  
54  
55  
56  
57  
58  
59  
60

1  
2  
3 Hartung et al. [8] evaluated the effects of the implementation of new policies applied by the Madras  
4 Medical Group family practice clinics. The policies included discontinuing seeing pharmaceutical  
5 representatives and stopping acceptance and distributing drug samples. The control group  
6 consisted of a regionally discrete sample of Medicaid enrollees who were not also enrolled in  
7 Medicare. The analysis used segmented linear regression models to compare 92,223 and 178,028  
8 pharmacy claims from the intervention and control groups covering 18 months before and 18  
9 months after policy implementation. In aggregate, use of “promoted agents” decreased by 1.4%  
10 while the use of “non-promoted branded agents” increased by 3.0%. However, the results varied  
11 by the class of drug. Interestingly, the investigators found that the average prescription drug cost  
12 increased significantly (by USD 5.2) immediately after policy implementation  
13  
14  
15  
16  
17  
18  
19  
20  
21  
22  
23  
24  
25  
26  
27  
28

## 29 Discussion

30  
31 In summary, our systematic review identified one RCT [9] and three observational studies. [6-8] The  
32 RCT found no effect of a “collaborative approach” between the pharmaceutical industry and the  
33 health authority. The three observational studies found a positive effect on prescription behavior of  
34 clinic policies aiming to reduce interaction between physicians and the pharmaceutical companies  
35 (in the form of free samples, promotional material, and meeting with pharmaceutical company  
36 representatives).  
37  
38  
39  
40  
41  
42  
43  
44  
45  
46  
47

48 A major strength of this study is the use of Cochrane methodology for conducting the systematic  
49 review. In addition, this is the first systematic review to focus on practicing physicians. Some of the  
50 limitations of this review relate to those of the included studies. Indeed, we identified a limited  
51 number of studies to allow strong conclusions. Also, the included studies suffered from risk of bias  
52  
53  
54  
55  
56  
57  
58  
59  
60

1  
2  
3 related to the lack of validity of outcome measurement, and the inadequate handling of significant  
4  
5 potential confounders.  
6  
7

8  
9  
10 The quality of evidence from the RCT was judged to be moderate due to imprecision (only 79  
11  
12 participants). The quality of evidence from observational studies was judged to be low due to study  
13  
14 design. Indeed, overall risk of bias was judged as low, and we did not find any evidence of  
15  
16 inconsistency, imprecision, indirectness or publication bias warranting further downgrading.  
17  
18

19  
20  
21 We identified only one other systematic review of the literature addressing the same question but  
22  
23 with residents instead of practicing physicians.<sup>[5]</sup> The review identified 12 eligible studies, seven  
24  
25 before-after studies and three controlled trials. The findings suggested that well-designed  
26  
27 seminars, role-playing, and focused curricula could affect trainee attitudes and behavior. However,  
28  
29 it was not clear whether these effects were sustainable long-term.  
30  
31  
32

### 33 34 35 36 **Implications for practice**

37  
38 Based on the evidence, health administrators aiming to reduce the negative impact of physicians'  
39  
40 interaction with pharmaceutical companies may not want to spend their resources on "collaborative  
41  
42 approaches" between pharmaceutical industry and the health authority. They are more likely to  
43  
44 benefit from implementing policies restricting free samples, industry supplied promotional  
45  
46 materials, and meeting with pharmaceutical company representatives.  
47  
48

### 49 50 51 **Implications for research**

52  
53 Future studies should address the methodological limitations of the available evidence. This  
54  
55 includes conducting well-designed randomized trials. Future observational studies should aim for  
56  
57  
58  
59  
60

1  
2  
3 proper assessment of the exposure, controlling for all confounders, and minimizing missing data.  
4

5 Future studies should also consider other types of interventions, including educational and  
6

7  
8 legislative one.  
9  
10  
11  
12  
13  
14  
15  
16  
17  
18  
19  
20  
21  
22  
23  
24  
25  
26  
27  
28  
29  
30  
31  
32  
33  
34  
35  
36  
37  
38  
39  
40  
41  
42  
43  
44  
45  
46  
47  
48  
49  
50  
51  
52  
53  
54  
55  
56  
57  
58  
59  
60

For peer review only

1  
2  
3  
4  
5  
6  
7  
8  
9  
10  
11  
12  
13  
14  
15  
16  
17  
18  
19  
20  
21  
22  
23  
24  
25  
26  
27  
28  
29  
30  
31  
32  
33  
34  
35  
36  
37  
38  
39  
40  
41  
42  
43  
44  
45  
46  
47  
48  
49

**TABLES AND FIGURES**

**Table 1: Characteristics of included RCT**

| Study Name                                                             | Study Design                     | Participants, setting                                                                       | Exposure                                                                                                                                                                                                                                                                          | Control                                                                                                                           | Outcomes                                                                                                | Notes                                            |
|------------------------------------------------------------------------|----------------------------------|---------------------------------------------------------------------------------------------|-----------------------------------------------------------------------------------------------------------------------------------------------------------------------------------------------------------------------------------------------------------------------------------|-----------------------------------------------------------------------------------------------------------------------------------|---------------------------------------------------------------------------------------------------------|--------------------------------------------------|
| Freemantle, 2000<br><br>Funding by<br>Warwickshire<br>Health Authority | • Randomized<br>controlled trial | • All 79<br>cardiovascular<br>practices in<br>Warwickshire<br>participated in the<br>trial. | • 40 practices who<br>received, in<br>addition to what<br>the control group<br>received:<br>• Letter from the<br>chief executive of<br>the health<br>authority<br>• Postgraduate<br>educational<br>allowance<br>accreditation<br>• A letter from the<br>pharmaceutical<br>advisor | • 39 practices who<br>received:<br>• Practice<br>guidelines<br>• Routine<br>marketing act<br>• Routine health<br>authority advice | • Proportion of<br>prescriptions in<br>line with the<br>guidelines<br>(behavior)<br>• Prescribing costs | • Time frame:<br>October 1997<br>and April 1998. |

Table 2: Characteristics of included observational studies

| Study Name and funding                                                     | Study Design                                                                                                                                               | Participants, setting                                                                                                                                                                                                                                            | Exposed group                                                                                                                                                                                                                                                                                                  | Control group                                                                                                                                                                                | Outcomes                                                                                                                                                                                                                                                                                                              | Notes                                                                                                                                                                                                   |
|----------------------------------------------------------------------------|------------------------------------------------------------------------------------------------------------------------------------------------------------|------------------------------------------------------------------------------------------------------------------------------------------------------------------------------------------------------------------------------------------------------------------|----------------------------------------------------------------------------------------------------------------------------------------------------------------------------------------------------------------------------------------------------------------------------------------------------------------|----------------------------------------------------------------------------------------------------------------------------------------------------------------------------------------------|-----------------------------------------------------------------------------------------------------------------------------------------------------------------------------------------------------------------------------------------------------------------------------------------------------------------------|---------------------------------------------------------------------------------------------------------------------------------------------------------------------------------------------------------|
| Boltri 2002<br>Funding by the Health Resources and Services Administration | <ul style="list-style-type: none"> <li>Retrospective cohort</li> <li>Charts from two time periods were reviewed for a diagnosis of hypertension</li> </ul> | <ul style="list-style-type: none"> <li>24 family practice residents and 8 clinical attending physicians faculty at the outpatient clinic of a family practice residency program in the southeastern United States.</li> </ul>                                    | <ul style="list-style-type: none"> <li>507 hypertensive patients during "Period 2": January and February 1998 after the policy prohibiting samples distribution was implemented in August 1997</li> </ul>                                                                                                      | <ul style="list-style-type: none"> <li>422 hypertensive patients during "Period 1": January and February 1997 before the policy prohibiting samples distribution was implemented.</li> </ul> | <ul style="list-style-type: none"> <li>Effect of policy on prescription of first line hypertension drugs versus prescription of second-line drugs by all physicians (by JNC VI)</li> </ul>                                                                                                                            | <ul style="list-style-type: none"> <li>Data collection of the outcome was based on the medical reports of all hypertensive patients during the two study periods.</li> </ul>                            |
| Spurling, 2007<br>Funding not reported                                     | <ul style="list-style-type: none"> <li>Prospective cohort</li> </ul>                                                                                       | <ul style="list-style-type: none"> <li>13 out of the 14 (7 part-time general practitioners (GPs), 3 practice nurses, 3 regular reception staff, 1 practice manager) participated</li> <li>Inala Health Centre General Practice in Brisbane, Australia</li> </ul> | <ul style="list-style-type: none"> <li>-Policy of reduced access to pharmaceutical sales representatives including: reception staff not to make appointments for representatives or accept promotional material; representatives cannot access sample cupboards; GPs wishing to see representatives</li> </ul> | <ul style="list-style-type: none"> <li>Pre policy</li> </ul>                                                                                                                                 | <ul style="list-style-type: none"> <li>Number of prescription per patient (behavior)</li> <li>Number of promotional materials (no further details provided)</li> <li>Number of samples in the drug cupboard and time booked for pharmaceutical sales representatives (actual implementation of the policy)</li> </ul> | <ul style="list-style-type: none"> <li>Timeframe: 2004</li> <li>The policy was evaluated 3 months pre policy and 9 months post policy</li> <li>Data collected through audit and staff survey</li> </ul> |

1  
2  
3  
4  
5  
6  
7  
8  
9  
10  
11  
12  
13  
14  
15  
16  
17  
18  
19  
20  
21  
22  
23  
24  
25  
26  
27  
28  
29  
30  
31  
32  
33  
34  
35  
36  
37  
38  
39  
40  
41  
42  
43  
44  
45  
46  
47  
48  
49

|                                                                                                                        |                                                                                                                              |                                                                                                                                                        |                                                                                                                                                                                 |                                                                                                                                                                                            |                                                                                                                                                                                            |                                                                                                                                                                          |
|------------------------------------------------------------------------------------------------------------------------|------------------------------------------------------------------------------------------------------------------------------|--------------------------------------------------------------------------------------------------------------------------------------------------------|---------------------------------------------------------------------------------------------------------------------------------------------------------------------------------|--------------------------------------------------------------------------------------------------------------------------------------------------------------------------------------------|--------------------------------------------------------------------------------------------------------------------------------------------------------------------------------------------|--------------------------------------------------------------------------------------------------------------------------------------------------------------------------|
|                                                                                                                        |                                                                                                                              |                                                                                                                                                        | may do so outside consulting hours.                                                                                                                                             |                                                                                                                                                                                            |                                                                                                                                                                                            |                                                                                                                                                                          |
| Hartung, 2010<br><br>Funding in part by an American Academy of Family Physicians Foundation Research Stimulation Grant | <ul style="list-style-type: none"> <li>Segmented linear regression models using locally obtained pharmacy claims.</li> </ul> | <ul style="list-style-type: none"> <li>The Madras Medical Group, a family practice clinic employing 5 physicians and 1 physician assistant;</li> </ul> | <ul style="list-style-type: none"> <li>After the implementation of a policy restricting access of pharmaceutical sales representatives to the clinic was implemented</li> </ul> | <ul style="list-style-type: none"> <li>Before the implementation of the a policy</li> <li>Oregon Medicaid pharmacy claims were used to control for secular prescribing changes.</li> </ul> | <ul style="list-style-type: none"> <li>Percentage of branded drug use (behavior)</li> <li>Percentage of promoted drug use (behavior)</li> <li>Average prescription costs (cost)</li> </ul> | <ul style="list-style-type: none"> <li>Time Frame: April 1, 2004, to September 31, 2007.</li> <li>In January 2006 the Medicare Part D program was implemented</li> </ul> |



Table 3: Risk of bias in included RCT

| Study Name       | Sequence generation                                                                                                               | Allocation concealment       | Blinding (participants, data collectors, outcome adjudicators) | Completeness of outcome data         | Completeness of outcome reporting                      |
|------------------|-----------------------------------------------------------------------------------------------------------------------------------|------------------------------|----------------------------------------------------------------|--------------------------------------|--------------------------------------------------------|
| Freemantle, 2000 | Low risk<br>"Practices were randomized to intervention or control using computer generated random numbers in a stratified scheme" | Unclear risk<br>Not reported | Unclear risk<br>Not reported                                   | Low risk<br>No missing data reported | Low risk<br>No evidence of selective outcome reporting |

1  
2  
3  
4  
5  
6  
7  
8  
9  
10  
11  
12  
13  
14  
15  
16  
17  
18  
19  
20  
21  
22  
23  
24  
25  
26  
27  
28  
29  
30  
31  
32  
33  
34  
35  
36  
37  
38  
39  
40  
41  
42  
43  
44  
45  
46  
47  
48  
49

**Table 4: Risk of bias in included observational studies**

| Study Name     | Developing and applying appropriate eligibility criteria                                                               | Measurement of exposure                          | Measurement of outcome                                                                                                              | Controlling for confounding                                                                                                                                                                        | Completeness of data                                                                                                                                                                                                                           |
|----------------|------------------------------------------------------------------------------------------------------------------------|--------------------------------------------------|-------------------------------------------------------------------------------------------------------------------------------------|----------------------------------------------------------------------------------------------------------------------------------------------------------------------------------------------------|------------------------------------------------------------------------------------------------------------------------------------------------------------------------------------------------------------------------------------------------|
| Boltri 2002    | Low risk<br><br>Physicians and residents in the control and exposed groups are of the same pool                        | Low risk<br><br>Policy applied across the clinic | Low risk<br><br>Data collection was based on medical records, and done by research assistant blinded to study design and hypothesis | Low risk<br><br>“Logistic regression was then performed to adjust the odds ratio for the relation of physician type, prescribing patterns, and time.”                                              | Low risk<br><br>No missing data reported                                                                                                                                                                                                       |
| Spurling, 2007 | Low risk<br><br>Diaries chosen at random for a 1-month period .A random week was chosen to audit doctors’ prescribing. | Low risk<br><br>Policy applied across the clinic | Unclear risk<br><br>Not clear whether the survey instrument was validated                                                           | High risk<br><br>According to the authors, the possibility of confounding cannot be ruled out                                                                                                      | Low risk.<br><br>All except one returned the completed questionnaire                                                                                                                                                                           |
| Hartung, 2010  | Unclear risk                                                                                                           | Low risk<br><br>Policy applied across the clinic | Unclear risk<br><br>Use of claim data; however validity of the data not described                                                   | Low risk<br><br>They include “a contemporaneous control group of patients or clinicians also experiencing this potential confounder.” (confounding resulting from secular changes in prescribing). | Low risk<br><br>‘Although it is possible that some prescriptions would not have been captured by using data from only one pharmacy, it seems unlikely that this subset would have introduced any systematic bias or loss of generalizability.’ |

## ACKNOWLEDGEMENTS

We would like to thank Ms. Aida Farha for her valuable help in designing the search strategy.

### Contributions of authors

Concept and design: EAA, LA, KM

Study selection: LA, LK, HN, HB

Data collection: LA, LK

Data analysis and interpretation: EAA, LA, LK, HB, KM

Drafting of the manuscript: EAA, LA

All authors reviewed and approved the submitted version of the manuscript.

*“The Corresponding Author has the right to grant on behalf of all authors and does grant on behalf of all authors, an exclusive license (or non-exclusive for UK Crown Employees) on a worldwide basis to the BMJ Publishing Group Ltd, and its Licensees to permit this article (if accepted) to be published in BMJ Open and any other BMJPGJ products and to exploit all subsidiary rights, as set out in our license.”*

## COMPETING INTERESTS

No competing interests to declare.

## FUNDING

This research received no specific grant from any funding agency in the public, commercial or not-for-profit sectors.

## DATA SHARING STATEMENT

There is no additional data available.

## REFERENCE LIST

1. Tong KL, Lien CY. Do pharmaceutical representatives misuse their drug samples? *Canadian family physician Medecin de famille canadien*. Aug 1995;41:1363-1366.
2. Dixon D, Takhar J, Macnab J, et al. Controlling quality in CME/CPD by measuring and illuminating bias. *The Journal of continuing education in the health professions*. Spring 2011;31(2):109-116.
3. Agrawal S, Brennan N, Budetti P. The Sunshine Act--effects on physicians. *The New England journal of medicine*. May 30 2013;368(22):2054-2057.
4. Silverman E. Everything you need to know about the Sunshine Act. *Bmj*. 2013;347:f4704.
5. Carroll AE, Vreeman RC, Buddenbaum J, Inui TS. To what extent do educational interventions impact medical trainees' attitudes and behaviors regarding industry-trainee and industry-physician relationships? *Pediatrics*. Dec 2007;120(6):e1528-1535.
6. Boltri JM, Gordon ER, Vogel RL. Effect of antihypertensive samples on physician prescribing patterns. *Family medicine*. Nov-Dec 2002;34(10):729-731.
7. Spurling G, Mansfield P. General practitioners and pharmaceutical sales representatives: quality improvement research. *Quality & safety in health care*. Aug 2007;16(4):266-270.
8. Hartung DM, Evans D, Haxby DG, Kraemer DF, Andeen G, Fagnan LJ. Effect of drug sample removal on prescribing in a family practice clinic. *Annals of family medicine*. Sep-Oct 2010;8(5):402-409.
9. Freemantle N, Johnson R, Dennis J, Kennedy A, Marchment M. Sleeping with the enemy? A randomized controlled trial of a collaborative health authority/industry intervention to influence prescribing practice. *British journal of clinical pharmacology*. Feb 2000;49(2):174-179.

## APPENDICIES

### Appendix 1: Search strategy

**Medline** 1946 to October Week 2 2012

Conflict of Interest.mp.or "Conflict of Interest"/

Drug Industry/

Gift Giving/

detailman.mp.

commercial information.mp.

((drug or pharma\*) adj3 (industry or firm\* or manufacture\* or compan\*)).mp.

physician\*.mp.

doctor\*.mp.

Physicians/

primary care.mp.

**EmBASE** 1980 to 2012 Week 41

Conflict of Interest.mp.or "Conflict of Interest"/

Drug Industry/

Gift Giving/

detailman.mp.

commercial information.mp.

((drug or pharma\*) adj3 (industry or firm\* or manufacture\* or compan\*)).mp.

physician\*.mp.

doctor\*.mp.

Physician/

primary care.mp.

1  
2  
3  
4  
5  
6  
7  
8  
9  
10  
11  
12  
13  
14  
15  
16  
17  
18  
19  
20  
21  
22  
23  
24  
25  
26  
27  
28  
29  
30  
31  
32  
33  
34  
35  
36  
37  
38  
39  
40  
41  
42  
43  
44  
45  
46  
47  
48  
49  
50  
51  
52  
53  
54  
55  
56  
57  
58  
59  
60

For peer review only

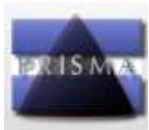

# PRISMA 2009 Flow Diagram

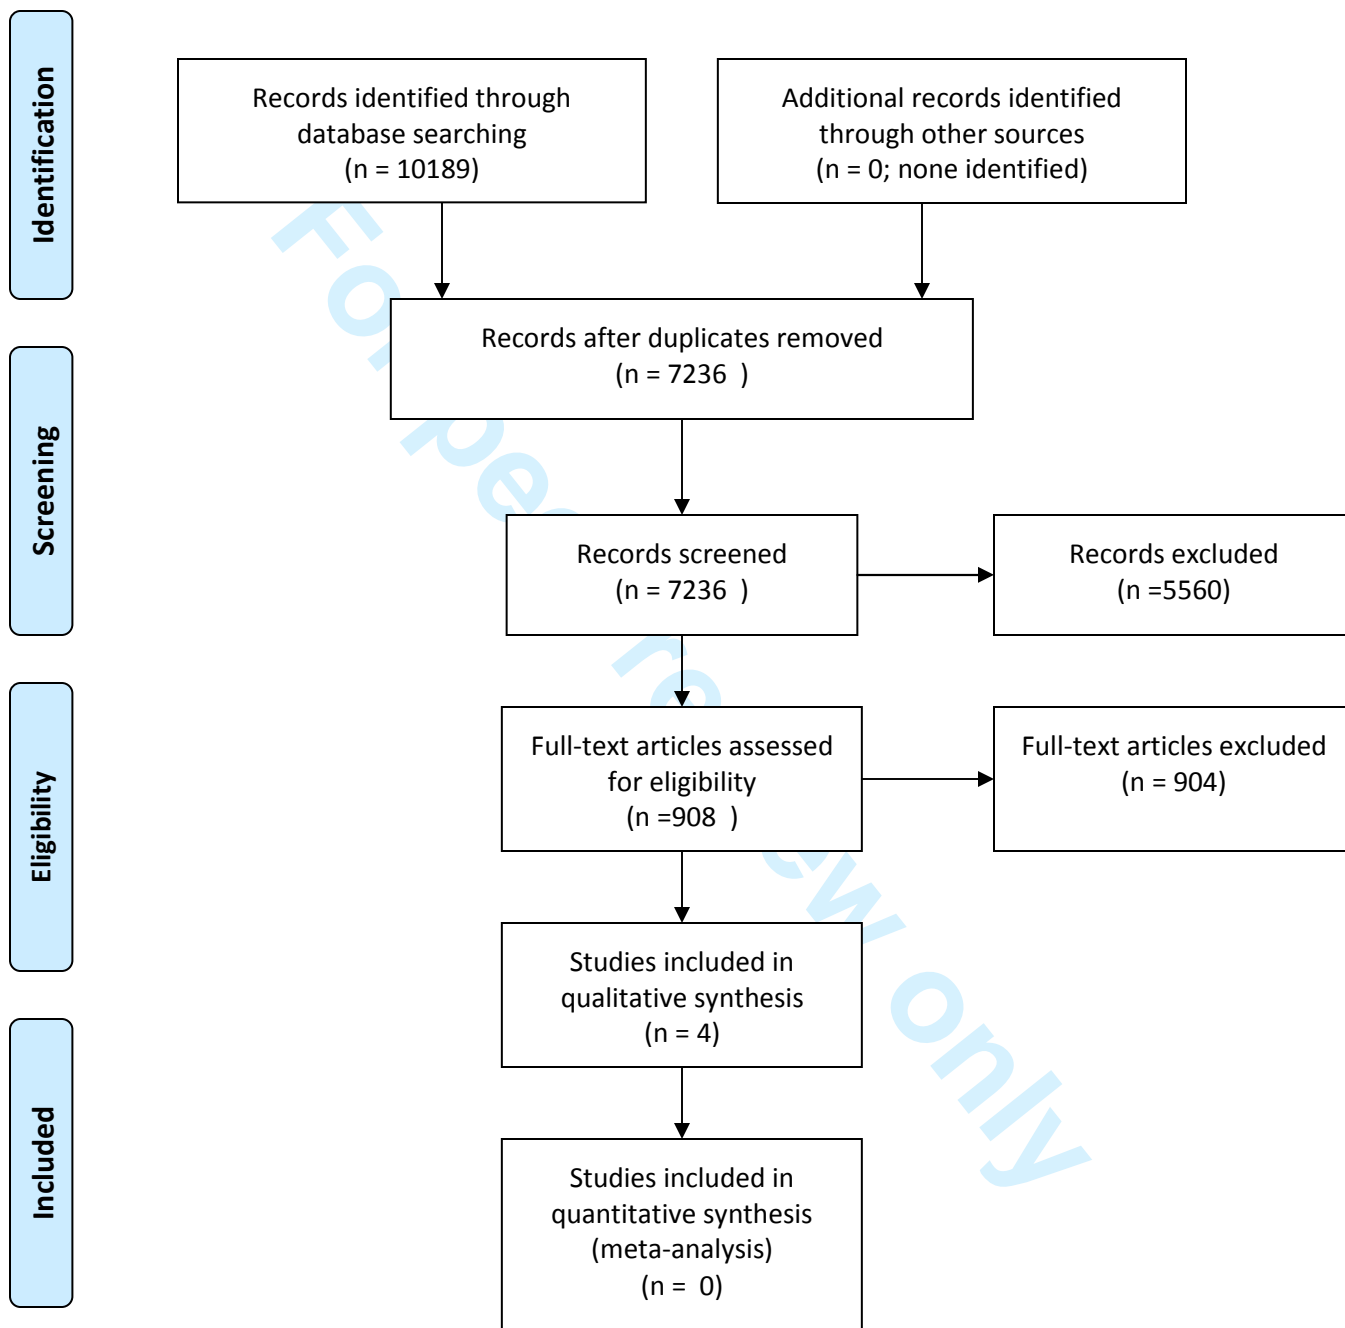

From: Moher D, Liberati A, Tetzlaff J, Altman DG, The PRISMA Group (2009). Preferred Reporting Items for Systematic Reviews and Meta-Analyses: The PRISMA Statement. PLoS Med 6(6): e1000097. doi:10.1371/journal.pmed1000097

For more information, visit [www.prisma-statement.org](http://www.prisma-statement.org).

For peer review only - <http://bmjopen.bmj.com/site/about/guidelines.xhtml>

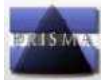

# PRISMA 2009 Checklist

| Section/topic                      | #  | Checklist item                                                                                                                                                                                                                                                                                              | Reported on page # |
|------------------------------------|----|-------------------------------------------------------------------------------------------------------------------------------------------------------------------------------------------------------------------------------------------------------------------------------------------------------------|--------------------|
| <b>TITLE</b>                       |    |                                                                                                                                                                                                                                                                                                             |                    |
| Title                              | 1  | Identify the report as a systematic review, meta-analysis, or both.                                                                                                                                                                                                                                         | 1                  |
| <b>ABSTRACT</b>                    |    |                                                                                                                                                                                                                                                                                                             |                    |
| Structured summary                 | 2  | Provide a structured summary including, as applicable: background; objectives; data sources; study eligibility criteria, participants, and interventions; study appraisal and synthesis methods; results; limitations; conclusions and implications of key findings; systematic review registration number. | 2, 3               |
| <b>INTRODUCTION</b>                |    |                                                                                                                                                                                                                                                                                                             |                    |
| Rationale                          | 3  | Describe the rationale for the review in the context of what is already known.                                                                                                                                                                                                                              | 4                  |
| Objectives                         | 4  | Provide an explicit statement of questions being addressed with reference to participants, interventions, comparisons, outcomes, and study design (PICOS).                                                                                                                                                  | 5                  |
| <b>METHODS</b>                     |    |                                                                                                                                                                                                                                                                                                             |                    |
| Protocol and registration          | 5  | Indicate if a review protocol exists, if and where it can be accessed (e.g., Web address), and, if available, provide registration information including registration number.                                                                                                                               | 4                  |
| Eligibility criteria               | 6  | Specify study characteristics (e.g., PICOS, length of follow-up) and report characteristics (e.g., years considered, language, publication status) used as criteria for eligibility, giving rationale.                                                                                                      | 5                  |
| Information sources                | 7  | Describe all information sources (e.g., databases with dates of coverage, contact with study authors to identify additional studies) in the search and date last searched.                                                                                                                                  | 6                  |
| Search                             | 8  | Present full electronic search strategy for at least one database, including any limits used, such that it could be repeated.                                                                                                                                                                               | 5, 6               |
| Study selection                    | 9  | State the process for selecting studies (i.e., screening, eligibility, included in systematic review, and, if applicable, included in the meta-analysis).                                                                                                                                                   | 6                  |
| Data collection process            | 10 | Describe method of data extraction from reports (e.g., piloted forms, independently, in duplicate) and any processes for obtaining and confirming data from investigators.                                                                                                                                  | 6, 7               |
| Data items                         | 11 | List and define all variables for which data were sought (e.g., PICOS, funding sources) and any assumptions and simplifications made.                                                                                                                                                                       | 6                  |
| Risk of bias in individual studies | 12 | Describe methods used for assessing risk of bias of individual studies (including specification of whether this was done at the study or outcome level), and how this information is to be used in any data synthesis.                                                                                      | 7                  |
| Summary measures                   | 13 | State the principal summary measures (e.g., risk ratio, difference in means).                                                                                                                                                                                                                               | 8                  |
| Synthesis of results               | 14 | Describe the methods of handling data and combining results of studies, if done, including measures of consistency (e.g., $I^2$ ) for each meta-analysis.                                                                                                                                                   | 8                  |



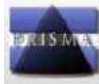

# PRISMA 2009 Checklist

| Section/topic                 | #  | Checklist item                                                                                                                                                                                           | Reported on page #  |
|-------------------------------|----|----------------------------------------------------------------------------------------------------------------------------------------------------------------------------------------------------------|---------------------|
| Risk of bias across studies   | 15 | Specify any assessment of risk of bias that may affect the cumulative evidence (e.g., publication bias, selective reporting within studies).                                                             | 7                   |
| Additional analyses           | 16 | Describe methods of additional analyses (e.g., sensitivity or subgroup analyses, meta-regression), if done, indicating which were pre-specified.                                                         | N/A: Not Applicable |
| <b>RESULTS</b>                |    |                                                                                                                                                                                                          |                     |
| Study selection               | 17 | Give numbers of studies screened, assessed for eligibility, and included in the review, with reasons for exclusions at each stage, ideally with a flow diagram.                                          | 8                   |
| Study characteristics         | 18 | For each study, present characteristics for which data were extracted (e.g., study size, PICOS, follow-up period) and provide the citations.                                                             | 8, 9                |
| Risk of bias within studies   | 19 | Present data on risk of bias of each study and, if available, any outcome level assessment (see item 12).                                                                                                | 9                   |
| Results of individual studies | 20 | For all outcomes considered (benefits or harms), present, for each study: (a) simple summary data for each intervention group (b) effect estimates and confidence intervals, ideally with a forest plot. | 9, 10, 11           |
| Synthesis of results          | 21 | Present results of each meta-analysis done, including confidence intervals and measures of consistency.                                                                                                  | N/A: Not Applicable |
| Risk of bias across studies   | 22 | Present results of any assessment of risk of bias across studies (see Item 15).                                                                                                                          | 16, 17              |
| Additional analysis           | 23 | Give results of additional analyses, if done (e.g., sensitivity or subgroup analyses, meta-regression [see Item 16]).                                                                                    | N/A                 |
| <b>DISCUSSION</b>             |    |                                                                                                                                                                                                          |                     |
| Summary of evidence           | 24 | Summarize the main findings including the strength of evidence for each main outcome; consider their relevance to key groups (e.g., healthcare providers, users, and policy makers).                     | 10, 11, 12          |
| Limitations                   | 25 | Discuss limitations at study and outcome level (e.g., risk of bias), and at review-level (e.g., incomplete retrieval of identified research, reporting bias).                                            | 3, 10, 11           |
| Conclusions                   | 26 | Provide a general interpretation of the results in the context of other evidence, and implications for future research.                                                                                  | 11, 12              |
| <b>FUNDING</b>                |    |                                                                                                                                                                                                          |                     |
| Funding                       | 27 | Describe sources of funding for the systematic review and other support (e.g., supply of data); role of funders for the systematic review.                                                               | 18                  |

From: Moher D, Liberati A, Tetzlaff J, Altman DG, The PRISMA Group (2009). Preferred Reporting Items for Systematic Reviews and Meta-Analyses: The PRISMA Statement. PLoS Med 6(6): e1000097. doi:10.1371/journal.pmed1000097

For more information, visit: [www.prisma-statement.org](http://www.prisma-statement.org).

# BMJ Open

## Legislative, educational, policy, and other interventions targeting physicians' interaction with pharmaceutical companies: A systematic review

|                                 |                                                                                                                                                                                                                                                                                                                                                                                                                                                                                                                                                                             |
|---------------------------------|-----------------------------------------------------------------------------------------------------------------------------------------------------------------------------------------------------------------------------------------------------------------------------------------------------------------------------------------------------------------------------------------------------------------------------------------------------------------------------------------------------------------------------------------------------------------------------|
| Journal:                        | <i>BMJ Open</i>                                                                                                                                                                                                                                                                                                                                                                                                                                                                                                                                                             |
| Manuscript ID:                  | bmjopen-2014-004880.R1                                                                                                                                                                                                                                                                                                                                                                                                                                                                                                                                                      |
| Article Type:                   | Research                                                                                                                                                                                                                                                                                                                                                                                                                                                                                                                                                                    |
| Date Submitted by the Author:   | 16-May-2014                                                                                                                                                                                                                                                                                                                                                                                                                                                                                                                                                                 |
| Complete List of Authors:       | Alkhaled, Lina; Faculty of Medicine, American University of Beirut, Department of Pediatrics and Adolescent Medicine<br>Kahale, Lara; Faculty of Health Sciences, American University of Beirut, Department of Epidemiology and Population Health<br>Nas, Hala; Faculty of Medicine, University of Damascus,<br>Brax, Hneine; Faculty of Medicine, Université Saint Joseph,<br>Fadlallah, Racha; American University of Beirut, Faculty of Health Sciences<br>Badr, Kamal; Faculty of Medicine, American University of Beirut, Department of Internal Medicine<br>Akl, Elie |
| <b>Primary Subject Heading</b>: | Health services research                                                                                                                                                                                                                                                                                                                                                                                                                                                                                                                                                    |
| Secondary Subject Heading:      | Health policy                                                                                                                                                                                                                                                                                                                                                                                                                                                                                                                                                               |
| Keywords:                       | Pharma, Gift giving, Conflict of interest, Drug industry, Primary care , Physician                                                                                                                                                                                                                                                                                                                                                                                                                                                                                          |
|                                 |                                                                                                                                                                                                                                                                                                                                                                                                                                                                                                                                                                             |

SCHOLARONE™  
Manuscripts

1  
2  
3 **Legislative, educational, policy, and other interventions targeting physicians'**  
4  
5  
6 **interaction with pharmaceutical companies: A systematic review**  
7  
8  
9

10  
11 Lina Alkhaled<sup>1</sup>, MD; Lara Kahale<sup>2</sup>,RN; Hala Nass<sup>3</sup>, MD; Hneine Brax<sup>4</sup>, MD; Racha Fadlallah<sup>2</sup>;  
12  
13 Kamal Badr<sup>5</sup>, MD, Elie A. Akl<sup>5,6,7</sup> MD, PhD.  
14  
15  
16  
17  
18  
19

20  
21 <sup>1</sup>*Department of Pediatrics and Adolescent Medicine, Faculty of Medicine, American University of Beirut,*  
22 *Beirut, Lebanon*  
23

24  
25 <sup>2</sup>*Faculty of Health Sciences, American University of Beirut, Beirut, Lebanon*  
26

27  
28 <sup>3</sup>*Faculty of Medicine, University of Damascus, Damascus, Syria*

29  
30 <sup>4</sup>*Faculty of Medicine, Université Saint Joseph, Beirut, Lebanon*

31  
32 <sup>5</sup>*Department of Internal Medicine, American University of Beirut, Beirut, Lebanon*

33  
34 <sup>6</sup>*Department of Clinical Epidemiology and Biostatistics, McMaster University, Hamilton, ON, Canada*

35  
36 <sup>7</sup>*Department of Medicine, State University of New York at Buffalo, Buffalo, NY, USA*  
37  
38  
39

40  
41 **Corresponding author:** Elie A. Akl, MD, MPH, PhD

42  
43 *AUBMC Department of Internal Medicine P.O. Box: 11-0236*

44  
45 *Riad-El-Solh Beirut 1107 2020*

46  
47 *Beirut – Lebanon*

48  
49  
50 *Phone: ++ 00961 1 374374*

51  
52 *[ea32@aub.edu.lb](mailto:ea32@aub.edu.lb)*  
53  
54  
55  
56  
57  
58  
59  
60

## ABSTRACT

**Background:** Pharmaceutical company representatives likely influence the prescribing habits and professional behavior of physicians.

**Objective:** The objective of this study was to systematically review the effects of interventions targeting practicing physicians' interactions with pharmaceutical companies.

**Eligibility criteria:** we included observational, non-randomized controlled trials, and randomized controlled trials evaluating legislative, educational, policy, or other interventions targeting the interactions between physicians and pharmaceutical companies

**Data sources:** The search strategy included an electronic search of MEDLINE and EMBASE. Two reviewers completed in duplicate and independently study selection, data abstraction, and assessment of risk of bias.

**Appraisal and synthesis methods:** We assessed the risk of bias in each included study. We summarized the findings narratively because the nature of the data did not allow conducting a meta-analysis. We assessed the quality of evidence by outcome using the GRADE methodology.

**Results:** Of 11,189 identified citations, one randomized clinical trial and three observational studies met the eligibility criteria. All four studies specifically targeted one type of interaction with pharmaceutical companies, i.e., interactions with drug representatives. The RCT provided moderate quality evidence of no effect of a "collaborative approach" between the pharmaceutical industry and the health authority. The three observational studies provided low quality evidence suggesting a positive effect of policies aiming to reduce interaction between physicians and the pharmaceutical companies (in the form of restricting free samples, promotional material, and meeting with pharmaceutical company representatives) on prescription behavior.

1  
2  
3 **Limitations:** We identified a limited number of studies to allow strong conclusions.  
4

5 **Conclusion:** Available evidence suggests a potential impact of policies aiming to reduce  
6  
7  
8 interaction between physicians and drug representatives on physicians' prescription behavior. We  
9  
10 identified no evidence about interventions affecting other types of interaction with pharmaceutical  
11  
12 companies.  
13  
14  
15  
16  
17  
18  
19  
20  
21  
22  
23  
24  
25  
26  
27  
28  
29  
30  
31  
32  
33  
34  
35  
36  
37  
38  
39  
40  
41  
42  
43  
44  
45  
46  
47  
48  
49  
50  
51  
52  
53  
54  
55  
56  
57  
58  
59  
60

For peer review only

## Article summary

### Article focus

- To systematically review the effects of interventions targeting practicing physicians' interactions with pharmaceutical companies

### Key messages

- There is a potential impact of policies aiming to reduce interaction between physicians and drug representatives on physicians' prescription behavior
- Potentially effective policies include: restricting free samples, promotional material, and meeting with pharmaceutical company representatives

### Strengths and limitations of this study:

- We followed Cochrane methodology for conducting this systematic review.
- This is the first systematic review to focus on practicing physicians.
- We identified a limited number of studies to allow strong conclusions.

## INTRODUCTION

Physicians may benefit from the relationship with pharmaceutical industry through access to information on new medications and products. However, the direct financial rewards provided to them could be used to persuade them to prescribe newer and more expensive drugs to patients.[1]

One industry market study found that physician profiling could increase the uptake of new drugs by 30%.[2] On the other hand, studies conducted in different parts of the world (e.g., Canada, France the United States, Australia and Malaysia) have consistently found that risk and harmful effects of drugs were often missing in presentations by pharmaceutical representatives to doctors.[3]

Similarly, there is a concern that by paying for the doctors' continuing education, drug companies make sure physicians learn what is important for the corporate bottom line.[4] A recent review article on this subject showed that industry-supported educational activities are biased toward the financial supporter's products and that clinicians attending such activities later prescribe these products more often than competing drugs [5]. One study found that pharmaceutical representatives commonly use different types of "influence techniques" when they detail products to medical practitioners.[6]

As a result to these concerns, legislators have tried to improve the transparency of the relationships between doctors and drug companies[3]. For example, the Physician Payments Sunshine Act (Sunshine Act) in the United States requires manufacturers of drugs, medical devices and biologicals participating in federal health care programs to report certain payments and items of value given to physicians and teaching hospitals [7].

1  
2  
3  
4  
5  
6  
7  
8  
9  
10  
11  
12  
13  
14  
15  
16  
17  
18  
19  
20  
21  
22  
23  
24  
25  
26  
27  
28  
29  
30  
31  
32  
33  
34  
35  
36  
37  
38  
39  
40  
41  
42  
43  
44  
45  
46  
47  
48  
49  
50  
51  
52  
53  
54  
55  
56  
57  
58  
59  
60

There have been also training programs to help restrict physicians' interactions with the pharmaceutical companies including well-designed seminars, role playing, and focused curricula [8]. The purpose of these programs is to help physicians better understand the conflicts of interest associated with the acceptance of gifts and other financial incentives and their potential effect on patient care.

While there has been at least one systematic review assessing interventions targeting residents and students interaction with pharmaceutical companies, we are not aware of any such systematic review focusing on practicing physicians.[8] The objective of this study was to systematically review the effects of interventions targeting practicing physicians' interactions with pharmaceutical companies.

## METHODS

### Eligibility criteria

The eligibility criteria were:

- Types of studies: observational studies (e.g., cohort) comparing an intervention of interest to a comparator (e.g., usual practice), non-randomized controlled trials, and randomized controlled trials.
- Types of participants: practicing physicians. We did not consider medical students, physicians in training, or other health professionals.
- Types of interventions: legislative, educational, policy, or other interventions targeting the interactions between physicians and pharmaceutical companies. Examples of such



1  
2  
3 interactions include contact with drug representatives, educational talks, and sponsored  
4 travel, etc.;

- 5  
6  
7  
8 • Types of outcomes: knowledge of physicians (e.g., about the potential effect of interactions  
9 on physician prescribing behavior); attitude of physicians (e.g. toward the usefulness of  
10 information from pharmaceutical company representatives); behavior of physicians (e.g.,  
11 prescription behavior, the rate of contact with pharmaceutical company representatives).  
12  
13  
14  
15  
16

17  
18  
19  
20 We did not exclude studies based on date of publication, but excluded studies not published in  
21 English.  
22  
23

## 24 25 26 27 **Search Strategy**

28  
29 We designed the search strategy with the help of a medical librarian (Appendix 1). The strategy  
30 included searching MEDLINE and EMBASE electronic databases using the OVID interface in April  
31 2014. The search combined terms for physicians, and pharmaceutical, and included both free text  
32 words and medical subject heading. We did not use any search filter. The appendix provides the  
33 full details of the search strategies. Additional search strategies included search of the grey  
34 literature (theses and dissertations). Also, we reviewed the references lists of included and relevant  
35 papers.  
36  
37  
38  
39  
40  
41  
42  
43  
44  
45  
46  
47

## 48 49 **Selection of studies**

50 Two reviewers independently screened the titles and abstracts of identified citations for potential  
51 eligibility. We obtained the full text for citations judged as potentially eligible by at least one of the 2  
52 reviewers. The two reviewers then independently screened the full texts for eligibility. They used a  
53 standardized and pilot tested screening form and resolved disagreement by discussion.  
54  
55  
56  
57  
58  
59  
60

## Data collection

Two reviewers independently abstracted data from eligible studies. They used a standardized and pilot tested screening form and detailed written instructions. They resolved disagreement by discussion. The data abstracted included the type of study; the funding source; the characteristics of the population, exposure, and control; the outcomes assessed; and statistical data.

## Assessment of risk of bias in included studies

Two reviewers assessed in duplicate and independently the risk of bias in each eligible study. They resolved disagreements by discussion or with the help of a third reviewer. According to recommendations outlined in the Cochrane Handbook, we used the following criteria for assessing the risk of bias in randomized studies:

- Inadequate sequence generation;
- Inadequate allocation concealment;
- Lack of blinding of participants, providers, data collectors, outcome adjudicators, and data analysts
- Incompleteness of outcome data.
- Selective outcome reporting, and other bias.

We used the following criteria for assessing the risk of bias in non-randomized studies:

- Failure to develop and apply appropriate eligibility criteria (e.g., under- or over-matching in case-control studies, selection of exposed and unexposed in cohort studies from different populations)
- Flawed measurement of both exposure and outcome (e.g., differences in measurement of

1  
2  
3 exposure such as recall bias in case-control studies, differential surveillance for outcome in  
4  
5 exposed and unexposed in cohort studies  
6

- 7
- 8 • Failure to adequately control confounding (e.g., failure to accurately measure all known  
9 prognostic factors, failure to match for prognostic factors and/or adjustment in statistical  
10 analysis  
11
- 12 • Incomplete follow-up  
13  
14  
15  
16

17 We graded each potential source of bias as high, low or unclear risk of bias.  
18  
19

## 20 21 22 **Data Analysis and Synthesis** 23

24 We assessed the agreement between reviewers for full text screening by calculating the kappa  
25 statistic. We did not conduct a meta-analysis due to the heterogeneity of study design, types of  
26 interventions, outcomes assessed, and outcome measures used. Instead, we summarized the data  
27 in a narrative way. We assessed the quality of evidence by outcome using the GRADE  
28 methodology.[9]  
29  
30  
31  
32  
33  
34  
35  
36  
37  
38

## 39 **RESULTS** 40

41  
42 **Results of the search** Figure 1 shows the study flow. Of the 11,189 identified articles, three  
43 observational studies and one randomized trial met our inclusion criteria. We excluded 27 full-text  
44 articles for the following reasons: studies assessed the association between interactions with  
45 pharmaceutical companies and behaviors (and effects of interventions) (n=15); and studies  
46 conducted among students or residents (n=12). The value of kappa statistic for full text screening  
47 was 0.893, reflecting high levels of agreement.  
48  
49  
50  
51  
52  
53  
54  
55  
56  
57  
58  
59  
60

## Description of included studies

Tables 1 and 2 show the characteristics of the included studies. All these studies assessed interventions that specifically targeted interactions of physicians with drug representatives. We identified no studies of interventions targeting other potential types of interaction with pharmaceutical companies (e.g., educational talks, sponsored travel).

These studies were conducted in Warwickshire in the United Kingdom, central Oregon in the United States, Brisbane in Australia, and Southeastern of the United States. Three studies evaluated the effects of the implementation of new legislations and regulatory policies [10 11] while one study evaluated the effects of various educational interventions[10]. These studies assessed the impact of intervention on physician knowledge, attitudes and behavior. The sample sizes in these studies also varied from 14 to 79.

Table 3 shows the assessment of the risk of bias in the one included RCT. The risk of bias was judged to be either low or unclear for the different criteria assessed [10]. Table 4 shows the assessment of the risk of bias in the three included observational studies [7-9]. We judged the risk of bias associated with the exposure measurement and the completeness of data as low for all included studies. We judged the risk of bias as either low or unclear for the remaining methodological features, except for confounding which we judged as high risk for one study [12].

## Effects of implementing new policies

As mentioned previously, one trial and three observational studies evaluated the effects of program or organizational policies that limit contact between physicians and pharmaceutical company representatives.

1  
2  
3  
4  
5  
6 Freemantle et al.[13] conducted a randomized controlled trial to assess the “a collaborative  
7  
8 approach” between the pharmaceutical industry and the local health authority. The collaborative  
9  
10 approach consisted of post-graduate educational allowance accreditation and a letter from the  
11  
12 pharmaceutical advisor asking the practice to agree to see the representative. Both the intervention  
13  
14 and the control groups received practice guidelines, routine marketing activity, and a routine Health  
15  
16 Authority advice. The authors do not provide further details about the “routine advice”, but the  
17  
18 Health Authorities in the United Kingdom apparently enact the directives of the Department of  
19  
20 Health, implement its fiscal policy, and run or commission local health services.[14] The specific  
21  
22 objective of the intervention was to substitute in primary care a proton inhibitor for an alternative  
23  
24 deemed therapeutically equivalent but less costly, based on “evidence based guidelines”. The  
25  
26 investigators reported that prescribing in both groups “moved towards that recommended by the  
27  
28 guidelines”. However, the proportion of prescriptions in line with the guidelines and the overall cost  
29  
30 were not different between the two groups.  
31  
32  
33  
34  
35  
36  
37  
38

39 Boltri et al. [10]conducted a retrospective cohort study of a new policy prohibiting drug samples  
40  
41 distribution (mainly hypertensive drugs). Participants included 24 family practice residents and 8  
42  
43 clinical attending physicians at an outpatient clinic in the southeastern United States. At six months  
44  
45 after the new policy implementation, prescription of first-line medication increased from 38% to  
46  
47 61% (odds ratio (OR) =2.73, 95% CI=1.29, 5.76)  
48  
49  
50  
51  
52

53 Spurling et al examined a cohort of 14 participants, 3 months prior and 9 months after the  
54  
55 implementation of a new policy.[12] This policy included: reception staff not making appointments  
56  
57 for pharmaceutical sales representatives nor accepting promotional material; pharmaceutical sales  
58  
59  
60

1  
2  
3 representatives not accessing sample cupboards; and general practitioners wishing to see  
4  
5 pharmaceutical sales representatives may do so outside consulting hours.  
6  
7  
8  
9

10 The investigators found that the number of overall promotional material were reduced by 32% and  
11  
12 21% at 3 and 9 months respectively post-intervention compared to pre-intervention. The number of  
13  
14 samples was reduced by 59%, and 70% at 3 and 9 months respectively post-intervention  
15  
16 compared to pre-intervention. The number of prescriptions per patient encounter fell from 0.99 pre-  
17  
18 intervention to 0.92 and 0.54 at 3 and 9 months post-intervention respectively. The number of  
19  
20 generic prescriptions increased from 4% pre-intervention to 8.6% and 8.1% after 3 and 9 months  
21  
22 post-intervention, respectively.  
23  
24  
25  
26  
27  
28

29 Hartung et al. [11] evaluated the effects of the implementation of new policies applied by the  
30  
31 Madras Medical Group family practice clinics (Ohio, United States). The policies included  
32  
33 discontinuing seeing pharmaceutical representatives and stopping acceptance and distributing  
34  
35 drug samples. The control group consisted of a regionally discrete sample of the Oregon Medicaid  
36  
37 program. Medicaid and Medicare are two governmental programs that provide medical and health-  
38  
39 related services to specific groups of people in the United States. The analysis used segmented  
40  
41 linear regression models to compare 92,223 and 178,028 pharmacy claims from the intervention  
42  
43 and control groups covering 18 months before and 18 months after policy implementation. In  
44  
45 aggregate, use of “promoted agents” decreased by 1.4% while the use of “non-promoted branded  
46  
47 agents” increased by 3.0%. However, the results varied by the class of drug. Interestingly, the  
48  
49 investigators found that the average prescription drug cost increased significantly (by USD 5.2)  
50  
51 immediately after policy implementation.  
52  
53  
54  
55  
56  
57  
58  
59  
60

### Assessment of the quality of evidence

Following the GRADE methodology, we judged the quality of evidence from the RCT as moderate due to imprecision (only 79 participants). We judged the quality of evidence from observational studies as low due to study design. Indeed, overall risk of bias was judged as low, and we did not find any evidence of inconsistency, imprecision, indirectness or publication bias warranting further downgrading.

### Discussion

In summary, our systematic review identified one RCT[13] and three observational studies,[10 11]. All included studies targeted one type of interaction with pharmaceutical companies, i.e., interactions with drug representatives. The RCT found no effect of a “collaborative approach” between the pharmaceutical industry and the health authority. The three observational studies found a positive effect on prescription behavior of clinic policies aiming to reduce interaction between physicians and the pharmaceutical companies (in the form of free samples, promotional material, and meeting with pharmaceutical company representatives). Our systematic review did not identify eligible studies assessing other relevant types of interactions between physicians and pharmaceutical companies, such as educational talks, sponsored travel.

A major strength of this study is the use of Cochrane methodology for conducting the systematic review. In addition, this is the first systematic review to focus on practicing physicians. Some of the limitations of this review relate to those of the included studies. Indeed, we identified a limited number of studies to allow strong conclusions. Also, the included studies suffered from risk of bias related to the lack of validity of outcome measurement, and the inadequate handling of significant potential confounders.

1  
2  
3  
4  
5  
6 The available evidence does not provide clear answers on why a “collaborative approach” between  
7  
8 the pharmaceutical industry and a health authority did not work, while policies restricting certain  
9  
10 types of interaction between physicians and the pharmaceutical companies worked. It might be that  
11  
12 restriction approaches are easier to implement compared to more complex interventions such  
13  
14 collaborative approaches. Also, it might be that the link between the restrictive interventions and  
15  
16 the desired outcome is clearer and shorter compared with the collaborative interventions.  
17

18  
19 The Physician Payment Sunshine Act (PPSA) enacted in 2010 in the United States marks the first  
20  
21 Congressional involvement in regulating the disclosure by physicians of payments by  
22  
23 pharmaceutical companies. Under this Act, manufacturers of drugs, medical devices and  
24  
25 biologicals participating in U.S. federal health care programs are required to report certain  
26  
27 payments and items of value given to physicians and teaching hospitals (e.g., speaking fees,  
28  
29 consulting arrangements, and free food). The purpose is to prevent undue influence and protect  
30  
31 the public interest.[4] The Sunshine Act could be viewed as a systems intervention targeting  
32  
33 physicians’ interactions with pharmaceutical companies. Although we have not identified at this  
34  
35 point any study assessing the impact of this Act on the prescription behavior of physicians, we  
36  
37 expect those studies to become available over the next few years.  
38  
39  
40  
41  
42  
43  
44

45  
46 While acknowledging the importance of regulation, some have called for physicians to take the  
47  
48 lead and minimize any undue commercial influence on their profession.[5] Professional  
49  
50 organization have a particularly important responsibility, given the relationships between physicians  
51  
52 and the pharmaceutical industry may erode social trust in medical professionals.[5]  
53  
54  
55  
56  
57  
58  
59  
60



1  
2  
3 A 2005 joint report by the World Health Organization (WHO) and the Health Action International  
4 (HAI) reported on interventions to counter promotional activities.[15] The evidence presented in  
5  
6 that report, although not eligible for our systematic review, mostly because it related to  
7  
8 interventions on students or residents. Nevertheless, the findings suggested that interventions such  
9  
10 as industry self-regulation, and guidelines for sales representatives are not effective, while  
11  
12 education about drug promotion might influence their attitudes. At that time, the report called for  
13  
14 research on interventions that could affect doctors' behavior.  
15  
16  
17  
18  
19  
20  
21

22 We identified only one other systematic review of the literature addressing the same question but  
23  
24 with residents and students instead of practicing physicians [8]. The review identified 12 eligible  
25  
26 studies, seven before-after studies and three controlled trials. The findings suggested that well-  
27  
28 designed seminars, role-playing, and focused curricula could affect trainee attitudes and behavior.  
29  
30 However, it was not clear whether these effects were sustainable long-term.  
31  
32  
33  
34  
35  
36

### 37 **Implications for practice**

38 Based on the evidence, health administrators aiming to reduce the negative impact of physicians'  
39  
40 interaction with pharmaceutical companies may not want to spend their resources on "collaborative  
41  
42 approaches" between pharmaceutical industry and the health authority. They may possibly benefit  
43  
44 from implementing policies restricting free samples, industry supplied promotional materials, and  
45  
46 meeting with pharmaceutical company representatives.  
47  
48  
49  
50  
51  
52

53 However, a potential limitation of implementing restriction policies is creating an "information gap"  
54  
55 that has been filled so far by the pharmaceutical representatives (e.g., information on new drugs).  
56  
57 Indeed, those representatives provide information to doctors about indications and dosages of  
58  
59  
60

1  
2  
3 medications to relatively high percentages of physicians [3]. Sales representatives are frequently  
4  
5 the only source of information about medicines in developing countries where there may be as  
6  
7 many as one representative for every five doctors[16].  
8  
9

10  
11  
12 As an alternative to complete restriction of interactions, some jurisdictions have attempted to  
13  
14 regulate interactions. In Australia, the Australian Pharmaceutical Manufacturers Association has a  
15  
16 code of conduct covering sales representatives. Although the code does not state what kind of  
17  
18 information sales representatives must provide, it does insist that their presentations be current,  
19  
20 accurate and balanced [16].  
21  
22  
23

### 24 25 **Implications for research** 26

27  
28 Future studies should address the methodological limitations of the available evidence. This  
29  
30 includes conducting well-designed randomized trials. Future observational studies should aim for  
31  
32 proper assessment of the exposure, controlling for all confounders, and minimizing missing data.  
33  
34 There is also a need for studies of other types of interventions, ( e.g., educational and legislative  
35  
36 interventions), as well as target other types of interactions with pharmaceutical companies (e.g.,  
37  
38 educational talks, sponsored travel). As the Sunshine Act gets implemented, we expect over the  
39  
40 next few years the publication of studies assessing its impact on the prescription behavior of  
41  
42 physicians.  
43  
44  
45  
46  
47  
48  
49  
50  
51  
52  
53  
54  
55  
56  
57  
58  
59  
60

1  
2  
3  
4  
5  
6  
7  
8  
9  
10  
11  
12  
13  
14  
15  
16  
17  
18  
19  
20  
21  
22  
23  
24  
25  
26  
27  
28  
29  
30  
31  
32  
33  
34  
35  
36  
37  
38  
39  
40  
41  
42  
43  
44  
45  
46  
47  
48  
49

**TABLES**

**Table 1: Characteristics of included RCT**

| Study Name                                                       | Study Design                  | Participants, setting                                                        | Exposure                                                                                                                                                                                                                                                                                                          | Control                                                                                                                                                                                   | Outcomes                                                                                                                                            | Notes                                      |
|------------------------------------------------------------------|-------------------------------|------------------------------------------------------------------------------|-------------------------------------------------------------------------------------------------------------------------------------------------------------------------------------------------------------------------------------------------------------------------------------------------------------------|-------------------------------------------------------------------------------------------------------------------------------------------------------------------------------------------|-----------------------------------------------------------------------------------------------------------------------------------------------------|--------------------------------------------|
| Freemantle, 2000<br><br>Funding by Warwickshire Health Authority | • Randomized controlled trial | • All 79 cardiovascular practices in Warwickshire participated in the trial. | <ul style="list-style-type: none"> <li>• 40 practices who received, in addition to what the control group received:</li> <li>• Letter from the chief executive of the health authority</li> <li>• Postgraduate educational allowance accreditation</li> <li>• A letter from the pharmaceutical advisor</li> </ul> | <ul style="list-style-type: none"> <li>• 39 practices who received:</li> <li>• Practice guidelines</li> <li>• Routine marketing act</li> <li>• Routine health authority advice</li> </ul> | <ul style="list-style-type: none"> <li>• Proportion of prescriptions in line with the guidelines (behavior)</li> <li>• Prescribing costs</li> </ul> | • Time frame: October 1997 and April 1998. |

**Table 2: Characteristics of included observational studies**

| Study Name and funding                                                         | Study Design                                                                                                                                               | Participants, setting                                                                                                                                                                                                                                            | Exposed group                                                                                                                                                                                                                               | Control group                                                                                                                                                                                | Outcomes                                                                                                                                                                                                                                                                        | Notes                                                                                                                                                                                                   |
|--------------------------------------------------------------------------------|------------------------------------------------------------------------------------------------------------------------------------------------------------|------------------------------------------------------------------------------------------------------------------------------------------------------------------------------------------------------------------------------------------------------------------|---------------------------------------------------------------------------------------------------------------------------------------------------------------------------------------------------------------------------------------------|----------------------------------------------------------------------------------------------------------------------------------------------------------------------------------------------|---------------------------------------------------------------------------------------------------------------------------------------------------------------------------------------------------------------------------------------------------------------------------------|---------------------------------------------------------------------------------------------------------------------------------------------------------------------------------------------------------|
| Boltri 2002<br><br>Funding by the Health Resources and Services Administration | <ul style="list-style-type: none"> <li>Retrospective cohort</li> <li>Charts from two time periods were reviewed for a diagnosis of hypertension</li> </ul> | <ul style="list-style-type: none"> <li>24 family practice residents and 8 clinical attending physicians faculty at the outpatient clinic of a family practice residency program in the southeastern United States.</li> </ul>                                    | <ul style="list-style-type: none"> <li>507 hypertensive patients during "Period 2": January and February 1998 after the policy prohibiting samples distribution was implemented in August 1997</li> </ul>                                   | <ul style="list-style-type: none"> <li>422 hypertensive patients during "Period 1": January and February 1997 before the policy prohibiting samples distribution was implemented.</li> </ul> | <ul style="list-style-type: none"> <li>Effect of policy on prescription of first line hypertension drugs versus prescription of second-line drugs by all physicians (by JNC VI)</li> </ul>                                                                                      | <ul style="list-style-type: none"> <li>Data collection of the outcome was based on the medical reports of all hypertensive patients during the two study periods.</li> </ul>                            |
| Spurling, 2007<br><br>Funding not reported                                     | <ul style="list-style-type: none"> <li>Prospective cohort</li> </ul>                                                                                       | <ul style="list-style-type: none"> <li>13 out of the 14 (7 part-time general practitioners (GPs), 3 practice nurses, 3 regular reception staff, 1 practice manager) participated</li> <li>Inala Health Centre General Practice in Brisbane, Australia</li> </ul> | <ul style="list-style-type: none"> <li>-Policy of reduced access to pharmaceutical sales representatives including: reception staff not to make appointments for representatives or accept promotional material; representatives</li> </ul> | <ul style="list-style-type: none"> <li>Pre policy</li> </ul>                                                                                                                                 | <ul style="list-style-type: none"> <li>Number of prescription per patient (behavior)</li> <li>Number of promotional materials (no further details provided)</li> <li>Number of samples in the drug cupboard and time booked for pharmaceutical sales representatives</li> </ul> | <ul style="list-style-type: none"> <li>Timeframe: 2004</li> <li>The policy was evaluated 3 months pre policy and 9 months post policy</li> <li>Data collected through audit and staff survey</li> </ul> |

1  
2  
3  
4  
5  
6  
7  
8  
9  
10  
11  
12  
13  
14  
15  
16  
17  
18  
19  
20  
21  
22  
23  
24  
25  
26  
27  
28  
29  
30  
31  
32  
33  
34  
35  
36  
37  
38  
39  
40  
41  
42  
43  
44  
45  
46  
47  
48  
49

|                                                                                                                        |                                                                                                                              |                                                                                                                                                        |                                                                                                                                                                                 |                                                                                                                                                                                            |                                                                                                                                                                                            |                                                                                                                                                                          |
|------------------------------------------------------------------------------------------------------------------------|------------------------------------------------------------------------------------------------------------------------------|--------------------------------------------------------------------------------------------------------------------------------------------------------|---------------------------------------------------------------------------------------------------------------------------------------------------------------------------------|--------------------------------------------------------------------------------------------------------------------------------------------------------------------------------------------|--------------------------------------------------------------------------------------------------------------------------------------------------------------------------------------------|--------------------------------------------------------------------------------------------------------------------------------------------------------------------------|
|                                                                                                                        |                                                                                                                              |                                                                                                                                                        | cannot access sample cupboards; GPs wishing to see representatives may do so outside consulting hours.                                                                          |                                                                                                                                                                                            | (actual implementation of the policy)                                                                                                                                                      |                                                                                                                                                                          |
| Hartung, 2010<br><br>Funding in part by an American Academy of Family Physicians Foundation Research Stimulation Grant | <ul style="list-style-type: none"> <li>Segmented linear regression models using locally obtained pharmacy claims.</li> </ul> | <ul style="list-style-type: none"> <li>The Madras Medical Group, a family practice clinic employing 5 physicians and 1 physician assistant;</li> </ul> | <ul style="list-style-type: none"> <li>After the implementation of a policy restricting access of pharmaceutical sales representatives to the clinic was implemented</li> </ul> | <ul style="list-style-type: none"> <li>Before the implementation of the a policy</li> <li>Oregon Medicaid pharmacy claims were used to control for secular prescribing changes.</li> </ul> | <ul style="list-style-type: none"> <li>Percentage of branded drug use (behavior)</li> <li>Percentage of promoted drug use (behavior)</li> <li>Average prescription costs (cost)</li> </ul> | <ul style="list-style-type: none"> <li>Time Frame: April 1, 2004, to September 31, 2007.</li> <li>In January 2006 the Medicare Part D program was implemented</li> </ul> |

**Table 3: Risk of bias in included RCT**

| Study Name       | Sequence generation                                                                                                               | Allocation concealment       | Blinding (participants, data collectors, outcome adjudicators) | Completeness of outcome data         | Completeness of outcome reporting                      |
|------------------|-----------------------------------------------------------------------------------------------------------------------------------|------------------------------|----------------------------------------------------------------|--------------------------------------|--------------------------------------------------------|
| Freemantle, 2000 | Low risk<br>"Practices were randomized to intervention or control using computer generated random numbers in a stratified scheme" | Unclear risk<br>Not reported | Unclear risk<br>Not reported                                   | Low risk<br>No missing data reported | Low risk<br>No evidence of selective outcome reporting |

1  
2  
3  
4  
5  
6  
7  
8  
9  
10  
11  
12  
13  
14  
15  
16  
17  
18  
19  
20  
21  
22  
23  
24  
25  
26  
27  
28  
29  
30  
31  
32  
33  
34  
35  
36  
37  
38  
39  
40  
41  
42  
43  
44  
45  
46  
47  
48  
49

**Table 4: Risk of bias in included observational studies**

| Study Name     | Developing and applying appropriate eligibility criteria                                                               | Measurement of exposure                          | Measurement of outcome                                                                                                              | Controlling for confounding                                                                                                                           | Completeness of data                                                                                                                         |
|----------------|------------------------------------------------------------------------------------------------------------------------|--------------------------------------------------|-------------------------------------------------------------------------------------------------------------------------------------|-------------------------------------------------------------------------------------------------------------------------------------------------------|----------------------------------------------------------------------------------------------------------------------------------------------|
| Boltri 2002    | Low risk<br><br>Physicians and residents in the control and exposed groups are of the same pool                        | Low risk<br><br>Policy applied across the clinic | Low risk<br><br>Data collection was based on medical records, and done by research assistant blinded to study design and hypothesis | Low risk<br><br>“Logistic regression was then performed to adjust the odds ratio for the relation of physician type, prescribing patterns, and time.” | Low risk<br><br>No missing data reported                                                                                                     |
| Spurling, 2007 | Low risk<br><br>Diaries chosen at random for a 1-month period .A random week was chosen to audit doctors’ prescribing. | Low risk<br><br>Policy applied across the clinic | Unclear risk<br><br>Not clear whether the survey instrument was validated                                                           | High risk<br><br>According to the authors, the possibility of confounding cannot be ruled out                                                         | Low risk.<br><br>All except one returned the completed questionnaire                                                                         |
| Hartung, 2010  | Unclear risk                                                                                                           | Low risk<br><br>Policy applied across the clinic | Unclear risk<br><br>Use of claim data; however validity of the data not described                                                   | Low risk<br><br>They include “a contemporaneous control group of patients or clinicians also experiencing this potential confounder.”                 | Low risk<br><br>‘Although it is possible that some prescriptions would not have been captured by using data from only one pharmacy, it seems |

|  |  |  |  |                                                              |                                                                                                   |
|--|--|--|--|--------------------------------------------------------------|---------------------------------------------------------------------------------------------------|
|  |  |  |  | (confounding resulting from secular changes in prescribing). | unlikely that this subset would have introduced any systematic bias or loss of generalizability.” |
|--|--|--|--|--------------------------------------------------------------|---------------------------------------------------------------------------------------------------|

For peer review only



## ACKNOWLEDGEMENTS

We would like to thank Ms. Aida Farha for her valuable help in designing the search strategy.

## FUNDING

None.

## CONTRIBUTIONS OF AUTHORS

Concept and design: EAA, LA, KB

Study selection: LA, LK, HN, HB, RF

Data collection: LA, LK

Data analysis and interpretation: EAA, LA, LK, HB, KB

Drafting of the manuscript: EAA, LA

All authors reviewed and approved the submitted version of the manuscript.

## DECLERATIONS OF INTEREST

None of the authors has conflicts of interest to declare.

## DATA SHARING STATEMENT

No additional data available

## Figure legend:

Figure 1: study flow

1  
2  
3  
4  
5  
6  
7  
8  
9  
10  
11  
12  
13  
14  
15  
16  
17  
18  
19  
20  
21  
22  
23  
24  
25  
26  
27  
28  
29  
30  
31  
32  
33  
34  
35  
36  
37  
38  
39  
40  
41  
42  
43  
44  
45  
46  
47  
48  
49  
50  
51  
52  
53  
54  
55  
56  
57  
58  
59  
60  

## REFERENCE LIST

1. Tong KL, Lien CY. Do pharmaceutical representatives misuse their drug samples? Canadian family physician *Medecin de famille canadien* 1995;**41**:1363-6
2. DataMonitor. Personalized physician marketing: Using physician profiling to maximize returns. New York, NY; 2001.
3. Othman N, Vitry AI, Roughead EE, et al. Medicines information provided by pharmaceutical representatives: a comparative study in Australia and Malaysia. *BMC public health* 2010;**10**:743 doi: 10.1186/1471-2458-10-743[published Online First: Epub Date]].
4. Dixon D, Takhar J, Macnab J, et al. Controlling quality in CME/CPD by measuring and illuminating bias. *The Journal of continuing education in the health professions* 2011;**31**(2):109-16 doi: 10.1002/chp.20114[published Online First: Epub Date]].
5. Grande D. Limiting the influence of pharmaceutical industry gifts on physicians: self-regulation or government intervention? *Journal of general internal medicine* 2010;**25**(1):79-83 doi: 10.1007/s11606-009-1016-7[published Online First: Epub Date]].
6. Roughead EE, Harvey KJ, Gilbert AL. Commercial detailing techniques used by pharmaceutical representatives to influence prescribing. *Australian and New Zealand journal of medicine* 1998;**28**(3):306-10
7. Silverman E. Everything you need to know about the Sunshine Act. *Bmj* 2013;**347**:f4704 doi: 10.1136/bmj.f4704[published Online First: Epub Date]].
8. Carroll AE, Vreeman RC, Buddenbaum J, et al. To what extent do educational interventions impact medical trainees' attitudes and behaviors regarding industry-trainee and industry-physician relationships? *Pediatrics* 2007;**120**(6):e1528-35
9. Guyatt G, Oxman AD, Akl EA, et al. GRADE guidelines: 1. Introduction-GRADE evidence profiles and summary of findings tables. *Journal of clinical epidemiology* 2011;**64**(4):383-94 doi: 10.1016/j.jclinepi.2010.04.026[published Online First: Epub Date]].
10. Boltri JM, Gordon ER, Vogel RL. Effect of antihypertensive samples on physician prescribing patterns. *Family medicine* 2002;**34**(10):729-31
11. Hartung DM, Evans D, Haxby DG, et al. Effect of drug sample removal on prescribing in a family practice clinic. *Annals of family medicine* 2010;**8**(5):402-9 doi: 10.1370/afm.1135[published Online First: Epub Date]].
12. Spurling G, Mansfield P. General practitioners and pharmaceutical sales representatives: quality improvement research. *Quality & safety in health care* 2007;**16**(4):266-70 doi: 10.1136/qshc.2006.020164[published Online First: Epub Date]].
13. Freemantle N, Johnson R, Dennis J, et al. Sleeping with the enemy? A randomized controlled trial of a collaborative health authority/industry intervention to influence prescribing practice. *British journal of clinical pharmacology* 2000;**49**(2):174-9
14. Wikipedia. NHS strategic health authority. Secondary NHS strategic health authority. [http://en.wikipedia.org/wiki/NHS\\_strategic\\_health\\_authority](http://en.wikipedia.org/wiki/NHS_strategic_health_authority).
15. Pauline Norris, Andrew Herxheimer, Joel Lexchin, et al. Drug Promotion – What We Know, What We Have Yet to Learn – Reviews of Materials in the WHO/HAI Database on Drug Promotion 2005 – EDM Research Series No. 032.
16. Wazana A. Physicians and the pharmaceutical industry: is a gift ever just a gift? *JAMA* 2000;**283**(3):373-80

1  
2  
3  
4  
5  
6  
7  
8  
9  
10  
11  
12  
13  
14  
15  
16  
17  
18  
19  
20  
21  
22  
23  
24  
25  
26  
27  
28  
29  
30  
31  
32  
33  
34  
35  
36  
37  
38  
39  
40  
41  
42  
43  
44  
45  
46  
47  
48  
49  
50  
51  
52  
53  
54  
55  
56  
57  
58  
59  
60

For peer review only

1  
2  
3  
4  
5  
6  
7  
8 **Legislative, educational, policy, and other interventions targeting physicians'**  
9  
10 **interaction with pharmaceutical companies: A systematic review**  
11  
12  
13

14  
15 **Co-authors:** [Lina Alkhaled<sup>1</sup>](#), MD; [Lara Kahale<sup>2</sup>](#), RN; [Hala Nass<sup>3</sup>](#), MD; [Hneine Brax<sup>4</sup>](#), MD; [Racha](#) ←

Formatted: Centered

16 [Fadlallah<sup>2</sup>](#); [Kamal Badr<sup>5</sup>](#), MD; [Elie A. Akl<sup>5,6,7</sup>](#), MD, PhD.  
17  
18  
19

20  
21 **Corresponding author:** [Elie A. Akl<sup>5,6,7</sup>](#), MD.

22 [AUBMC Department of Internal Medicine P.O. Box: 11-0236](#)

23 [Riad-El Solh Beirut 1107-2020](#)

24 [Beirut—Lebanon](#)

25 [Phone: ++ 00961 1 374374](#)

26 [ea32@aub.edu.lb](#)  
27  
28  
29  
30  
31  
32  
33

34 <sup>1</sup>*Department of Pediatrics and Adolescent Medicine, Faculty of Medicine, American University of Beirut,*  
35 *Beirut, Lebanon*

36  
37 <sup>2</sup>*Department of Epidemiology and Population Health, Faculty of Health Sciences, American University of*  
38 *Beirut, Beirut, Lebanon*

39  
40 <sup>3</sup>*Faculty of Medicine, University of Damascus, Damascus, Syria*

41  
42 <sup>4</sup>*Faculty of Medicine, Université Saint Joseph, Beirut, Lebanon*

43  
44 <sup>5</sup>*Department of Internal Medicine, American University of Beirut, Beirut, Lebanon*

45  
46 <sup>6</sup>*Department of Clinical Epidemiology and Biostatistics, McMaster University, Hamilton, ON, Canada*

47  
48 <sup>7</sup>*Department of Medicine, State University of New York at Buffalo, Buffalo, NY, USA*  
49  
50  
51

52 **Corresponding author:** [Elie A. Akl, MD, MPH, PhD](#)  
53  
54  
55

AUBMC Department of Internal Medicine P.O. Box: 11-0236

Riad-El-Solh Beirut 1107 2020

Beirut – Lebanon

Phone: ++ 00961 1 374374

ea32@aub.edu.lb

## ABSTRACT

### **Background:**

Pharmaceutical company representatives likely influence the prescribing habits and professional behavior of physicians.

**Objective:** The objective of this study was to systematically review the effects of interventions targeting practicing physicians' interactions with pharmaceutical companies.

**Eligibility criteria:** we included observational, non-randomized controlled trials, and randomized controlled trials evaluating legislative, educational, policy, or other interventions targeting the interactions between physicians and pharmaceutical companies

### **Methods**

~~We used the Cochrane approach to systematic reviews.~~ The search strategy included an electronic search of MEDLINE and EMBASE. Two reviewers completed in duplicate and independently study selection, data abstraction, and assessment of risk of bias.

**Appraisal and synthesis methods:** We assessed the risk of bias in each included study. We summarized the findings narratively because the nature of the data did not allow conducting a meta-analysis. We assessed the quality of evidence by outcome using the GRADE methodology.

Formatted: Font: Bold

**Results:**

Of 110,189 identified citations, one randomized clinical trial and three observational studies met the eligibility criteria. All four studies specifically targeted one type of interaction with pharmaceutical companies, i.e., interactions with drug representatives. The RCT provided moderate quality evidence of no effect of a “collaborative approach” between the pharmaceutical industry and the health authority. The three observational studies provided low quality evidence suggesting a positive effect of policies aiming to reduce interaction between physicians and the pharmaceutical companies (in the form of restricting free samples, promotional material, and meeting with pharmaceutical company representatives) on prescription behavior.

Limitations: We identified a limited number of studies to allow strong conclusions.

**Conclusion:**

Available evidence suggests a potential impact of policies aiming to reduce interaction between physicians and drug representatives the pharmaceutical companies on physicians' prescription behavior. We identified no evidence about interventions affecting other types of interaction with pharmaceutical companies.

## Article summary

### Article focus

- To systematically review the effects of interventions targeting practicing physicians' interactions with pharmaceutical companies

### Key messages

- There is a potential impact of policies aiming to reduce interaction between physicians and drug representatives on physicians' prescription behavior
- Potentially effective policies include: restricting free samples, promotional material, and meeting with pharmaceutical company representatives

### Strengths and limitations of this study:

- We followed Cochrane methodology for conducting this systematic review.
- This is the first systematic review to focus on practicing physicians.
- We identified a limited number of studies to allow strong conclusions.

## INTRODUCTION

Physicians may benefit from the relationship with pharmaceutical industry through access to information on new medications and products. However, the direct financial rewards provided to them could be used to persuade them to prescribe newer and more expensive drugs to patients.[1]

One industry market study found that physician profiling could increase the uptake of new drugs by 30%.<sup>[2]</sup> On the other hand, studies conducted in different parts of the world (e.g., Canada, France the United States, Australia and Malaysia) have consistently found that risk and harmful effects of drugs were often missing in presentations by pharmaceutical representatives to doctors.<sup>[3]</sup>

~~Drug industry also promotes its products through supporting continuing medical education.~~

~~Similarly, there is also~~ a concern that by paying for the doctors' continuing education, drug companies make sure physicians learn what is important for the corporate bottom line.<sup>[4]</sup> ~~## A~~ recent review article on this subject showed that industry-supported educational activities are biased toward the financial supporter's products and that clinicians attending such activities later prescribe these products more often than competing drugs <sup>[5]</sup>. One study found that pharmaceutical representatives commonly use different types of "influence techniques" when they detail products to medical practitioners.<sup>[6]</sup>

As a result to these concerns, legislators have tried to improve the transparency of the relationships between doctors and drug companies<sup>[3]</sup>. ~~##~~ For example, the Physician Payments Sunshine Act (Sunshine Act) in the United States requires manufacturers of drugs, medical devices and biologicals participating in federal health care programs to report certain payments and items of value given to physicians and teaching hospitals<sup>[7]</sup>.



1  
2  
3  
4  
5  
6  
7  
8  
9  
10 There have been also training programs to help restrict physicians' interactions with the  
11 pharmaceutical companies [including well-designed seminars, role playing, and focused curricula](#)  
12 [8]. The purpose of these programs is to help physicians better understand the conflicts of interest  
13 associated with the acceptance of gifts and other financial incentives and their potential effect on  
14 patient care.  
15  
16  
17  
18  
19

20  
21  
22 [While there has been at least one systematic review assessing interventions targeting residents](#)  
23 [and students interaction with pharmaceutical companies, we are not aware of any such systematic](#)  
24 [review focusing on practicing physicians.](#) [8] The objective of this study was to systematically review  
25 the effects of interventions targeting [practicing](#) physicians' interactions with pharmaceutical  
26 companies.  
27  
28  
29  
30  
31

## 32 33 METHODS

### 34 35 Eligibility criteria

36  
37 The eligibility criteria were:

- 38  
39 • Types of studies: observational studies (e.g., cohort) [comparing an intervention of interest](#)  
40 [to a comparator \(e.g., usual practice\)](#), non-randomized controlled trials, and randomized  
41 controlled trials.  
42
  - 43  
44 • Types of participants: practicing physicians. We did not consider medical students,  
45 physicians in training, or other health professionals.  
46  
47
  - 48  
49 • Types of interventions: legislative, educational, policy, or other interventions targeting the  
50 interactions between physicians and [drug representatives pharmaceutical companies.](#)  
51  
52
- 53  
54  
55  
56  
57  
58  
59  
60

1  
2  
3  
4  
5  
6  
7  
8 Examples of such interactions include contact with drug representatives, educational talks,  
9 and sponsored travel, etc.;

- 10  
11  
12 • Types of outcomes: knowledge of physicians (e.g., about the potential effect of interactions  
13 on physician prescribing behavior); attitude of physicians (e.g. toward the usefulness of  
14 information from pharmaceutical company representatives); behavior of physicians (e.g.,  
15 prescription behavior, the rate of contact with pharmaceutical company representatives).  
16  
17  
18  
19

20  
21 We did not exclude studies based on date of publication, but excluded studies not published in  
22 English.  
23  
24

### 25 26 27 **Search Strategy**

28  
29 We designed the search strategy with the help of a medical librarian (Appendix 1). The strategy  
30 included searching MEDLINE and EMBASE electronic databases using the OVID interface in  
31 September-April 2014<sup>42</sup>. The search combined terms for physicians, and pharmaceutical, and  
32 included both free text words and medical subject heading. We did not use any search filter. The  
33 appendix provides the full details of the search strategies. Additional search strategies included  
34 search of the grey literature (theses and dissertations). Also, we reviewed the references lists of  
35 included and relevant papers.  
36  
37  
38  
39  
40  
41  
42  
43  
44

### 45 **Selection of studies**

46  
47 Two reviewers independently screened ~~in duplicate and independently~~ the titles and abstracts of  
48 identified citations for potential eligibility. We obtained the full text for citations judged as potentially  
49 eligible by at least one of the 2 reviewers. The two reviewers then independently screened ~~in~~  
50  
51  
52  
53  
54

1  
2  
3  
4  
5  
6  
7  
8 ~~duplicate and independently~~ the full texts for eligibility. They used a standardized and pilot tested  
9 screening form and resolved disagreement by discussion.  
10  
11

#### 12 13 14 **Data collection**

15  
16 Two reviewers independently abstracted ~~in duplicate and independently~~ data from eligible studies.  
17  
18 They used a standardized and pilot tested screening form and detailed written instructions. They  
19  
20 resolved disagreement by discussion. ~~We calculated the agreement between the two authors for~~  
21 ~~the assessment of trial eligibility using kappa statistic.~~ The data abstracted included the type of  
22 study; the funding source; the characteristics of the population, exposure, and control; the  
23  
24 outcomes assessed; and statistical data.  
25  
26  
27  
28

#### 29 30 **Assessment of risk of bias in included studies**

31 Two reviewers assessed in duplicate and independently the risk of bias in each eligible study. They  
32  
33 resolved disagreements by discussion or with the help of a third reviewer. According to  
34  
35 recommendations outlined in the Cochrane Handbook, we used the following criteria for assessing  
36  
37 the risk of bias in randomized studies:  
38

- 39 • Inadequate sequence generation;
- 40
- 41 • Inadequate allocation concealment;
- 42
- 43 • Lack of blinding of participants, providers, data collectors, outcome adjudicators, and data  
44 analysts
- 45
- 46 • Incompleteness of outcome data.
- 47
- 48 • Selective outcome reporting, and other bias.
- 49
- 50

51 We used the following criteria for assessing the risk of bias in non-randomized studies:  
52  
53  
54

- Failure to develop and apply appropriate eligibility criteria (e.g., under- or over-matching in case-control studies, selection of exposed and unexposed in cohort studies from different populations)
- Flawed measurement of both exposure and outcome (e.g., differences in measurement of exposure such as recall bias in case-control studies, differential surveillance for outcome in exposed and unexposed in cohort studies)
- Failure to adequately control confounding (e.g., failure to accurately measure all known prognostic factors, failure to match for prognostic factors and/or adjustment in statistical analysis)
- Incomplete follow-up

We graded each potential source of bias as high, low or unclear risk of bias.

### Data Analysis and Synthesis

We assessed the agreement between reviewers for full text screening by calculating the kappa statistic. We did not conduct a meta-analysis due to the heterogeneity of study design, types of interventions, outcomes assessed, and outcome measures used. Instead, we summarized the data in a narrative way. We assessed the quality of evidence by outcome using the GRADE methodology.<sup>[9]</sup>

Formatted: Font color: Yellow

## RESULTS

### Results of the search ~~Description of included studies~~

Figure 1 shows the study flow. Of the 110,189 identified articles, three observational studies and one randomized trial met our inclusion criteria. We excluded 27 full-text articles for the following

1  
2  
3  
4  
5  
6  
7  
8 reasons: studies assessed the association between interactions with pharmaceutical companies  
9 and behaviors (and effects of interventions) (n=15); and studies conducted among students or  
10 residents (n=12). The value of kappa statistic for full text screening was 0.893, reflecting high levels  
11  
12  
13  
14 of agreement.

### 15 16 17 18 Description of included studies

19  
20 Tables 1 and 2 show the characteristics of the included studies. All these studies assessed  
21 interventions that specifically targeted interactions of physicians with drug representatives. We  
22 identified no studies of interventions targeting other potential types of interaction with  
23 pharmaceutical companies (e.g., educational talks, sponsored travel).  
24  
25  
26  
27  
28

29  
30 These studies were conducted in Warwickshire in the United Kingdom, central Oregon in the  
31 United States, Brisbane in Australia, and Southeastern of the United States. Three studies  
32 evaluated the effects of the implementation of new legislations and regulatory policies [10 11] while  
33 one study evaluated the effects of various educational interventions [10]. These studies assessed  
34 the impact of intervention on physician knowledge, attitudes and behavior. The sample sizes in  
35 these studies also varied from 14 to 79.  
36  
37  
38  
39  
40  
41  
42

43 Table 3 shows the assessment of the risk of bias in the one included RCT. The risk of bias was  
44 judged to be either low or unclear for the different criteria assessed [10]. Table 4 shows the  
45 assessment of the risk of bias in the three included observational studies [7-9]. We judged the risk  
46 of bias associated with the exposure measurement and the completeness of data as low for all  
47 included studies. We judged the risk of bias as either low or unclear for the remaining  
48 methodological features, except for confounding which we judged as high risk for one study [12].  
49  
50  
51  
52  
53  
54

### Effects of implementing new policies

As mentioned previously, one trial and three observational studies evaluated the effects of program or organizational policies that limit contact between physicians and pharmaceutical company representatives.

Freemantle et al,[13] conducted a randomized controlled trial to assess the “a collaborative approach” between the pharmaceutical industry and the local health authority. The collaborative approach consisted of post-graduate educational allowance accreditation and a letter from the pharmaceutical advisor asking the practice to agree to see the representative. where bBoth the intervention and the control groups received practice guidelines, routine marketing activity, and a routine Hhealth Aauthority advice. The authors do not provide further details about the “routine advice”, but the Health Authorities in the United Kingdom apparently enact the directives of the Department of Health, implement its fiscal policy, and run or commission local health services.[14] In addition, the interventional group received post-graduate educational allowance accreditation and a letter from the pharmaceutical advisor asking the practice to “agree to see the representative preceded approaches by company representatives to specific practices”. The specific objective of the intervention was to substitute in primary care a proton inhibitor for an alternative deemed therapeutically equivalent but less costly, based on “evidence based guidelines”. The investigators reported that pto assess the “additional benefits from a collaborative approach” between the pharmaceutical industry and the health authority. Prescribing in both groups “moved towards that

1  
2  
3  
4  
5  
6  
7  
8 recommended by the guidelines". However, the proportion of prescriptions in line with the  
9  
10 guidelines and the overall cost were not different between the two groups.  
11  
12

13  
14 Boltri et al. [10] conducted a retrospective cohort study of a new policy prohibiting drug samples  
15 distribution (mainly hypertensive drugs). Participants included 24 family practice residents and 8  
16 clinical attending physicians at an outpatient clinic in the southeastern United States. At six months  
17 after the new policy implementation, prescription of first-line medication increased from 38% to  
18 61% (odds ratio (OR) =2.73, 95% CI=1.29, 5.76)  
19  
20  
21  
22  
23

24  
25 Spurling et al. examined a cohort of 14 participants, 3 months prior and 9 months after the  
26 implementation of a new policy. [12] ~~that~~ This policy included: reception staff not making  
27 appointments for pharmaceutical sales representatives nor accepting promotional material;  
28 pharmaceutical sales representatives not accessing sample cupboards; and general practitioners  
29 wishing to see pharmaceutical sales representatives may do so outside consulting hours.  
30  
31  
32  
33  
34  
35

36  
37 The investigators found that the number of overall promotional material were reduced by 32% and  
38 21% at 3 and 9 months respectively post-intervention compared to pre-intervention. The number of  
39 samples was reduced by 59%, and 70% at 3 and 9 months respectively post-intervention  
40 compared to pre-intervention. The number of prescriptions per patient encounter fell from 0.99 pre-  
41 intervention to 0.92 and 0.54 at 3 and 9 months post-intervention respectively. The number of  
42 generic prescriptions increased from 4% pre-intervention to 8.6% and 8.1% after 3 and 9 months  
43 post-intervention, respectively.  
44  
45  
46  
47  
48  
49  
50

1  
2  
3  
4  
5  
6  
7  
8 Hartung et al. [11] evaluated the effects of the implementation of new policies applied by the  
9  
10 Madras Medical Group family practice clinics ([Ohio, United States](#)). The policies included  
11  
12 discontinuing seeing pharmaceutical representatives and stopping acceptance and distributing  
13  
14 drug samples. The control group consisted of a regionally discrete sample of [the Oregon Medicaid](#)  
15  
16 [program](#) [Medicaid enrollees who were not also enrolled in Medicare](#). [Medicaid and Medicare are](#)  
17  
18 [two governmental programs that provide medical and health-related services to specific groups of](#)  
19  
20 [people in the United States](#). The analysis used segmented linear regression models to compare  
21  
22 92,223 and 178,028 pharmacy claims from the intervention and control groups covering 18 months  
23  
24 before and 18 months after policy implementation. In aggregate, use of “promoted agents”  
25  
26 decreased by 1.4% while the use of “non-promoted branded agents” increased by 3.0%. However,  
27  
28 the results varied by the class of drug. Interestingly, the investigators found that the average  
29  
30 prescription drug cost increased significantly (by USD 5.2) immediately after policy implementation.

### **Assessment of the quality of evidence**

31  
32  
33 [Following the GRADE methodology, we judged the quality of evidence from the RCT as moderate](#)  
34  
35 [due to imprecision \(only 79 participants\). We judged the quality of evidence from observational](#)  
36  
37 [studies as low due to study design. Indeed, overall risk of bias was judged as low, and we did not](#)  
38  
39 [find any evidence of inconsistency, imprecision, indirectness or publication bias warranting further](#)  
40  
41 [downgrading.](#)

42  
43  
44 [The quality of evidence from the RCT was judged to be moderate due to imprecision \(only 79](#)  
45  
46 [participants\). The quality of evidence from observational studies was judged to be low due to study](#)  
47  
48 [design. Indeed, overall risk of bias was judged as low, and we did not find any evidence of](#)  
49  
50 [inconsistency, imprecision, indirectness or publication bias warranting further downgrading.](#)  
51  
52



## Discussion

In summary, our systematic review identified one RCT<sup>[13]</sup> and three observational studies<sup>[10 11]</sup>.

All included studies targeted one type of interaction with pharmaceutical companies, i.e., interactions with drug representatives. The RCT found no effect of a “collaborative approach” between the pharmaceutical industry and the health authority. The three observational studies found a positive effect on prescription behavior of clinic policies aiming to reduce interaction between physicians and the pharmaceutical companies (in the form of free samples, promotional material, and meeting with pharmaceutical company representatives). Our systematic review did not identify eligible studies assessing other relevant types of interactions between physicians and pharmaceutical companies, such as educational talks, sponsored travel.

A major strength of this study is the use of Cochrane methodology for conducting the systematic review. In addition, this is the first systematic review to focus on practicing physicians. Some of the limitations of this review relate to those of the included studies. Indeed, we identified a limited number of studies to allow strong conclusions. Also, the included studies suffered from risk of bias related to the lack of validity of outcome measurement, and the inadequate handling of significant potential confounders.

The available evidence does not provide clear answers on why a “collaborative approach” between the pharmaceutical industry and a health authority did not work, while policies restricting certain types of interaction between physicians and the pharmaceutical companies worked. It might be that

1  
2  
3  
4  
5  
6  
7  
8 restriction approaches are easier to implement compared to more complex interventions such  
9 collaborative approaches. Also, it might be that the link between the restrictive interventions and  
10 the desired outcome is clearer and shorter compared with the collaborative interventions.  
11

12 ~~The quality of evidence from the RCT was judged to be moderate due to imprecision (only 70~~  
13 ~~participants). The quality of evidence from observational studies was judged to be low due to study~~  
14 ~~design. Indeed, overall risk of bias was judged as low, and we did not find any evidence of~~  
15 ~~inconsistency, imprecision, indirectness or publication bias warranting further downgrading.~~  
16

17 ~~The 2010 enactment of the Physician Payment Sunshine Act (PPSA) marks the first Congressional~~  
18 ~~involvement in the regulation of disclosure related to pharmaceutical marketing. (i.e. pharma~~  
19

20 ~~companies will be recording payments to doctors—speaking fees, consulting arrangements, and~~  
21 ~~free food) To prevent undue influence and protect the public fisc, a number of states began~~  
22 ~~regulating these marketing practices, requiring companies to disclose all gifts to practitioners,~~  
23 ~~prohibiting the commercialized sale of prescription data, and prohibiting certain gifts altogether.~~  
24

25 ~~The 2010 enactment of the Physician Payment Sunshine Act (PPSA) marks the first Congressional~~  
26 ~~involvement in the regulation of disclosure related to pharmaceutical marketing.~~  
27

28 ~~Overall, the Act improves transparency in pharmaceutical marketing to physicians and expands~~  
29 ~~the regulation of disclosure of pharmaceutical marketing activities in important substantive ways~~  
30

31 ~~Between 1993 and 2011 a number of states and D.C. passed laws that (1) require manufacturers~~  
32 ~~to disclose payments and gifts to physicians, (2) prohibit certain gifts altogether, (3) require the~~  
33 ~~adoption of a compliance code, and (4) prohibit data mining of practitioners' prescribing patterns.<sup>4</sup>~~  
34

35 The Physician Payment Sunshine Act (PPSA) enacted in 2010 in the United States marks the first  
36 Congressional involvement in regulating the disclosure by physicians of payments by  
37 pharmaceutical companies. Under this Act, manufacturers of drugs, medical devices and  
38 biologicals participating in U.S. federal health care programs are required to report certain  
39

1  
2  
3  
4  
5  
6  
7  
8 payments and items of value given to physicians and teaching hospitals (e.g., speaking fees,  
9 consulting arrangements, and free food). The purpose is to prevent undue influence and protect  
10 the public interest.[4] The Sunshine Act could be viewed as a systems intervention targeting  
11 physicians' interactions with pharmaceutical companies. Although we have not identified at this  
12 point any study assessing the impact of this Act on the prescription behavior of physicians, we  
13 expect those studies to become available over the next few years.

14  
15  
16  
17  
18  
19  
20  
21 While acknowledging the importance of regulation, some have called for physicians to take the  
22 lead and minimize any undue commercial influence on their profession.[5] Professional  
23 organization have a particularly important responsibility, given the relationships between physicians  
24 and the pharmaceutical industry may erode social trust in medical professionals.[5]

25  
26  
27  
28  
29  
30  
31 A 2005 joint report by the World Health Organization (WHO) and the Health Action International  
32 (HAI) reported on interventions to counter promotional activities.[15] The evidence presented in  
33 that report, although not eligible for our systematic review, mostly because it related to  
34 interventions on students or residents. Nevertheless, the findings suggested that interventions such  
35 as industry self-regulation, and guidelines for sales representatives are not effective, while  
36 education about drug promotion might influence their attitudes. At that time, the report called for  
37 research on interventions that could affect doctors' behavior.

38  
39  
40  
41  
42  
43  
44  
45  
46  
47 We identified only one other systematic review of the literature addressing the same question but  
48 with residents and students instead of practicing physicians [8]. The review identified 12 eligible  
49 studies, seven before-after studies and three controlled trials. The findings suggested that well-  
50  
51  
52  
53  
54

1  
2  
3  
4  
5  
6  
7  
8 designed seminars, role-playing, and focused curricula could affect trainee attitudes and behavior.

9  
10 However, it was not clear whether these effects were sustainable long-term.

### 11 12 13 14 **Implications for practice**

15  
16 Based on the evidence, health administrators aiming to reduce the negative impact of physicians'  
17 interaction with pharmaceutical companies may not want to spend their resources on "collaborative  
18 approaches" between pharmaceutical industry and the health authority. They ~~are more likely to~~  
19 ~~may~~  
20 ~~possibly~~ benefit from implementing policies restricting free samples, industry supplied promotional  
21 materials, and meeting with pharmaceutical company representatives.  
22  
23  
24

25  
26  
27 However, a potential limitation of implementing restriction policies is creating an "information gap"  
28 that has been filled so far by the pharmaceutical representatives (e.g., information on new drugs).  
29 Indeed, those representatives provide information to doctors about indications and dosages of  
30 medications to relatively high percentages of physicians [3]. Sales representatives are frequently  
31 the only source of information about medicines in developing countries where there may be as  
32 many as one representative for every five doctors[16].  
33  
34  
35  
36  
37  
38  
39

40  
41 As an alternative to complete restriction of interactions, some jurisdictions have attempted to  
42 regulate interactions. In Australia, the Australian Pharmaceutical Manufacturers Association has a  
43 code of conduct covering sales representatives. Although the code does not state what kind of  
44 information sales representatives must provide, it does insist that their presentations be current,  
45 accurate and balanced [16].  
46  
47  
48  
49

50  
51 <sup>3</sup>Sales representatives are frequently the only source of information about medicines in developing  
52 countries where there may be as many as one representative for every five doctors.  
53  
54

1  
2  
3  
4  
5  
6  
7  
8  
9  
10 Most doctors think information from pharmaceutical companies is biased, but many think it is  
11 useful.

12  
13  
14 ~~Sales representatives are frequently the only source of information about medicines in developing~~  
15 ~~countries where there may be as many as one representative for every five doctors.~~

16  
17  
18 ~~Sales representatives and other commercial sources were not evaluated highly, but sales~~  
19 ~~representatives were the most frequent source of first information about medicines, and were one~~  
20 ~~of the most frequently mentioned sources of information needed to prescribe.~~

21  
22  
23  
24 In Australia, the Australian Pharmaceutical Manufacturers Association has a code of conduct  
25 covering sales representatives. Although the code does not state what kind of information sales  
26 representatives must provide, it does insist that their presentations be current, accurate and  
27 balanced<sup>13</sup>.

### 31 32 Implications for research

33  
34 Future studies should address the methodological limitations of the available evidence. This  
35 includes conducting well-designed randomized trials. Future observational studies should aim for  
36 proper assessment of the exposure, controlling for all confounders, and minimizing missing data.

37  
38  
39  
40 ~~There is also a need for Future studies should also consider~~ other types of interventions,  
41 ~~(including e.g., educational e.g., educational and legislative interventions), as well as target~~  
42 ~~other types of interactions with pharmaceutical companies (e.g., educational talks, sponsored~~  
43 ~~travel). As the Sunshine Act gets implemented, we expect over the next few years the publication~~  
44 ~~of studies assessing its impact on the prescription behavior of physicians.~~

1  
2  
3  
4  
5  
6  
7  
8 **TABLES AND FIGURES**  
9

10  
11 **Table 1: Characteristics of included RCT**  
12  
13

| Study Name                                                         | Study Design                     | Participants, setting                                                                       | Exposure                                                                                                                                                                                                                                                                                                          | Control                                                                                                                                                                                   | Outcomes                                                                                                                                            | Notes                                                                                        |
|--------------------------------------------------------------------|----------------------------------|---------------------------------------------------------------------------------------------|-------------------------------------------------------------------------------------------------------------------------------------------------------------------------------------------------------------------------------------------------------------------------------------------------------------------|-------------------------------------------------------------------------------------------------------------------------------------------------------------------------------------------|-----------------------------------------------------------------------------------------------------------------------------------------------------|----------------------------------------------------------------------------------------------|
| Freemantle, 2000<br>Funding by<br>Warwickshire<br>Health Authority | • Randomized<br>controlled trial | • All 79<br>cardiovascular<br>practices in<br>Warwickshire<br>participated in the<br>trial. | <ul style="list-style-type: none"> <li>• 40 practices who received, in addition to what the control group received:</li> <li>• Letter from the chief executive of the health authority</li> <li>• Postgraduate educational allowance accreditation</li> <li>• A letter from the pharmaceutical advisor</li> </ul> | <ul style="list-style-type: none"> <li>• 39 practices who received:</li> <li>• Practice guidelines</li> <li>• Routine marketing act</li> <li>• Routine health authority advice</li> </ul> | <ul style="list-style-type: none"> <li>• Proportion of prescriptions in line with the guidelines (behavior)</li> <li>• Prescribing costs</li> </ul> | <ul style="list-style-type: none"> <li>• Time frame: October 1997 and April 1998.</li> </ul> |

1  
2  
3  
4  
5  
6  
7  
8  
9  
10  
11  
12  
13  
14  
15  
16  
17  
18  
19  
20  
21  
22  
23  
24  
25  
26  
27  
28  
29  
30  
31  
32  
33  
34  
35  
36  
37  
38  
39  
40  
41  
42  
43  
44  
45  
46  
47  
48  
49

**Table 2: Characteristics of included observational studies**

| Study Name and funding                                                         | Study Design                                                                                                                                               | Participants, setting                                                                                                                                                                                                                                            | Exposed group                                                                                                                                                                                                                              | Control group                                                                                                                                                                                | Outcomes                                                                                                                                                                                                                                                                        | Notes                                                                                                                                                                                                   |
|--------------------------------------------------------------------------------|------------------------------------------------------------------------------------------------------------------------------------------------------------|------------------------------------------------------------------------------------------------------------------------------------------------------------------------------------------------------------------------------------------------------------------|--------------------------------------------------------------------------------------------------------------------------------------------------------------------------------------------------------------------------------------------|----------------------------------------------------------------------------------------------------------------------------------------------------------------------------------------------|---------------------------------------------------------------------------------------------------------------------------------------------------------------------------------------------------------------------------------------------------------------------------------|---------------------------------------------------------------------------------------------------------------------------------------------------------------------------------------------------------|
| Boltri 2002<br><br>Funding by the Health Resources and Services Administration | <ul style="list-style-type: none"> <li>Retrospective cohort</li> <li>Charts from two time periods were reviewed for a diagnosis of hypertension</li> </ul> | <ul style="list-style-type: none"> <li>24 family practice residents and 8 clinical attending physicians faculty at the outpatient clinic of a family practice residency program in the southeastern United States.</li> </ul>                                    | <ul style="list-style-type: none"> <li>507 hypertensive patients during "Period 2": January and February 1998 after the policy prohibiting samples distribution was implemented in August 1997</li> </ul>                                  | <ul style="list-style-type: none"> <li>422 hypertensive patients during "Period 1": January and February 1997 before the policy prohibiting samples distribution was implemented.</li> </ul> | <ul style="list-style-type: none"> <li>Effect of policy on prescription of first line hypertension drugs versus prescription of second-line drugs by all physicians (by JNC VI)</li> </ul>                                                                                      | <ul style="list-style-type: none"> <li>Data collection of the outcome was based on the medical reports of all hypertensive patients during the two study periods.</li> </ul>                            |
| Spurling, 2007<br><br>Funding not reported                                     | <ul style="list-style-type: none"> <li>Prospective cohort</li> </ul>                                                                                       | <ul style="list-style-type: none"> <li>13 out of the 14 (7 part-time general practitioners (GPs), 3 practice nurses, 3 regular reception staff, 1 practice manager) participated</li> <li>Inala Health Centre General Practice in Brisbane, Australia</li> </ul> | <ul style="list-style-type: none"> <li>Policy of reduced access to pharmaceutical sales representatives including: reception staff not to make appointments for representatives or accept promotional material; representatives</li> </ul> | <ul style="list-style-type: none"> <li>Pre policy</li> </ul>                                                                                                                                 | <ul style="list-style-type: none"> <li>Number of prescription per patient (behavior)</li> <li>Number of promotional materials (no further details provided)</li> <li>Number of samples in the drug cupboard and time booked for pharmaceutical sales representatives</li> </ul> | <ul style="list-style-type: none"> <li>Timeframe: 2004</li> <li>The policy was evaluated 3 months pre policy and 9 months post policy</li> <li>Data collected through audit and staff survey</li> </ul> |

1  
2  
3  
4  
5  
6  
7  
8  
9  
10  
11  
12  
13  
14  
15  
16  
17  
18  
19  
20  
21  
22  
23  
24  
25  
26  
27  
28  
29  
30  
31  
32  
33  
34  
35  
36  
37  
38  
39  
40  
41  
42  
43  
44  
45  
46  
47  
48  
49

|                                                                                                                        |                                                                                                                              |                                                                                                                                                        |                                                                                                                                                                                 |                                                                                                                                                                                            |                                                                                                                                                                                            |                                                                                                                                                                          |
|------------------------------------------------------------------------------------------------------------------------|------------------------------------------------------------------------------------------------------------------------------|--------------------------------------------------------------------------------------------------------------------------------------------------------|---------------------------------------------------------------------------------------------------------------------------------------------------------------------------------|--------------------------------------------------------------------------------------------------------------------------------------------------------------------------------------------|--------------------------------------------------------------------------------------------------------------------------------------------------------------------------------------------|--------------------------------------------------------------------------------------------------------------------------------------------------------------------------|
|                                                                                                                        |                                                                                                                              |                                                                                                                                                        | cannot access sample cupboards; GPs wishing to see representatives may do so outside consulting hours.                                                                          |                                                                                                                                                                                            | (actual implementation of the policy)                                                                                                                                                      |                                                                                                                                                                          |
| Hartung, 2010<br><br>Funding in part by an American Academy of Family Physicians Foundation Research Stimulation Grant | <ul style="list-style-type: none"> <li>Segmented linear regression models using locally obtained pharmacy claims.</li> </ul> | <ul style="list-style-type: none"> <li>The Madras Medical Group, a family practice clinic employing 5 physicians and 1 physician assistant;</li> </ul> | <ul style="list-style-type: none"> <li>After the implementation of a policy restricting access of pharmaceutical sales representatives to the clinic was implemented</li> </ul> | <ul style="list-style-type: none"> <li>Before the implementation of the a policy</li> <li>Oregon Medicaid pharmacy claims were used to control for secular prescribing changes.</li> </ul> | <ul style="list-style-type: none"> <li>Percentage of branded drug use (behavior)</li> <li>Percentage of promoted drug use (behavior)</li> <li>Average prescription costs (cost)</li> </ul> | <ul style="list-style-type: none"> <li>Time Frame: April 1, 2004, to September 31, 2007.</li> <li>In January 2006 the Medicare Part D program was implemented</li> </ul> |



1  
2  
3  
4  
5  
6  
7  
8  
9  
10  
11  
12  
13  
14  
15  
16  
17  
18  
19  
20  
21  
22  
23  
24  
25  
26  
27  
28  
29  
30  
31  
32  
33  
34  
35  
36  
37  
38  
39  
40  
41  
42  
43  
44  
45  
46  
47  
48  
49

**Table 3: Risk of bias in included RCT**

| Study Name       | Sequence generation                                                                                                               | Allocation concealment       | Blinding (participants, data collectors, outcome adjudicators) | Completeness of outcome data         | Completeness of outcome reporting                      |
|------------------|-----------------------------------------------------------------------------------------------------------------------------------|------------------------------|----------------------------------------------------------------|--------------------------------------|--------------------------------------------------------|
| Freemantle, 2000 | Low risk<br>"Practices were randomized to intervention or control using computer generated random numbers in a stratified scheme" | Unclear risk<br>Not reported | Unclear risk<br>Not reported                                   | Low risk<br>No missing data reported | Low risk<br>No evidence of selective outcome reporting |

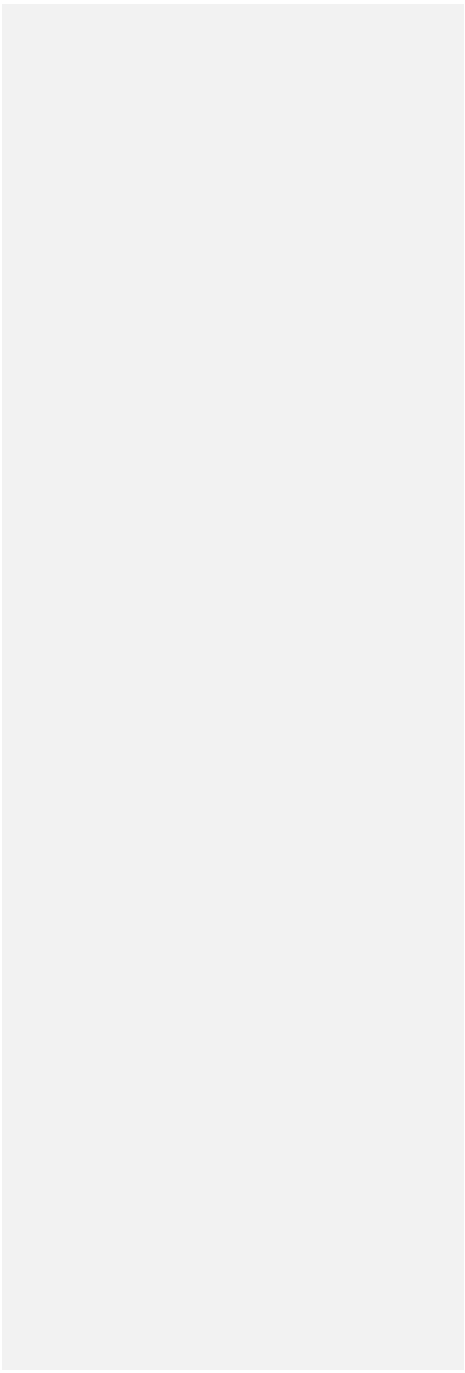

Table 4: Risk of bias in included observational studies

| Study Name     | Developing and applying appropriate eligibility criteria                                                               | Measurement of exposure                          | Measurement of outcome                                                                                                              | Controlling for confounding                                                                                                                           | Completeness of data                                                                                                                         |
|----------------|------------------------------------------------------------------------------------------------------------------------|--------------------------------------------------|-------------------------------------------------------------------------------------------------------------------------------------|-------------------------------------------------------------------------------------------------------------------------------------------------------|----------------------------------------------------------------------------------------------------------------------------------------------|
| Boltri 2002    | Low risk<br><br>Physicians and residents in the control and exposed groups are of the same pool                        | Low risk<br><br>Policy applied across the clinic | Low risk<br><br>Data collection was based on medical records, and done by research assistant blinded to study design and hypothesis | Low risk<br><br>"Logistic regression was then performed to adjust the odds ratio for the relation of physician type, prescribing patterns, and time." | Low risk<br><br>No missing data reported                                                                                                     |
| Spurling, 2007 | Low risk<br><br>Diaries chosen at random for a 1-month period .A random week was chosen to audit doctors' prescribing. | Low risk<br><br>Policy applied across the clinic | Unclear risk<br><br>Not clear whether the survey instrument was validated                                                           | High risk<br><br>According to the authors, the possibility of confounding cannot be ruled out                                                         | Low risk.<br><br>All except one returned the completed questionnaire                                                                         |
| Hartung, 2010  | Unclear risk                                                                                                           | Low risk<br><br>Policy applied across the clinic | Unclear risk<br><br>Use of claim data; however validity of the data not described                                                   | Low risk<br><br>They include "a contemporaneous control group of patients or clinicians also experiencing this potential confounder."                 | Low risk<br><br>'Although it is possible that some prescriptions would not have been captured by using data from only one pharmacy, it seems |

1  
2  
3  
4  
5  
6  
7  
8  
9  
10  
11  
12  
13  
14  
15  
16  
17  
18  
19  
20  
21  
22  
23  
24  
25  
26  
27  
28  
29  
30  
31  
32  
33  
34  
35  
36  
37  
38  
39  
40  
41  
42  
43  
44  
45  
46  
47  
48  
49

|  |  |  |  |                                                              |                                                                                                   |
|--|--|--|--|--------------------------------------------------------------|---------------------------------------------------------------------------------------------------|
|  |  |  |  | (confounding resulting from secular changes in prescribing). | unlikely that this subset would have introduced any systematic bias or loss of generalizability.” |
|--|--|--|--|--------------------------------------------------------------|---------------------------------------------------------------------------------------------------|

For peer review only



Figure 1: Study flow

Formatted: Font: Arial Narrow, 12 pt, Bold

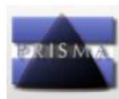

PRISMA 2009 Flow Diagram

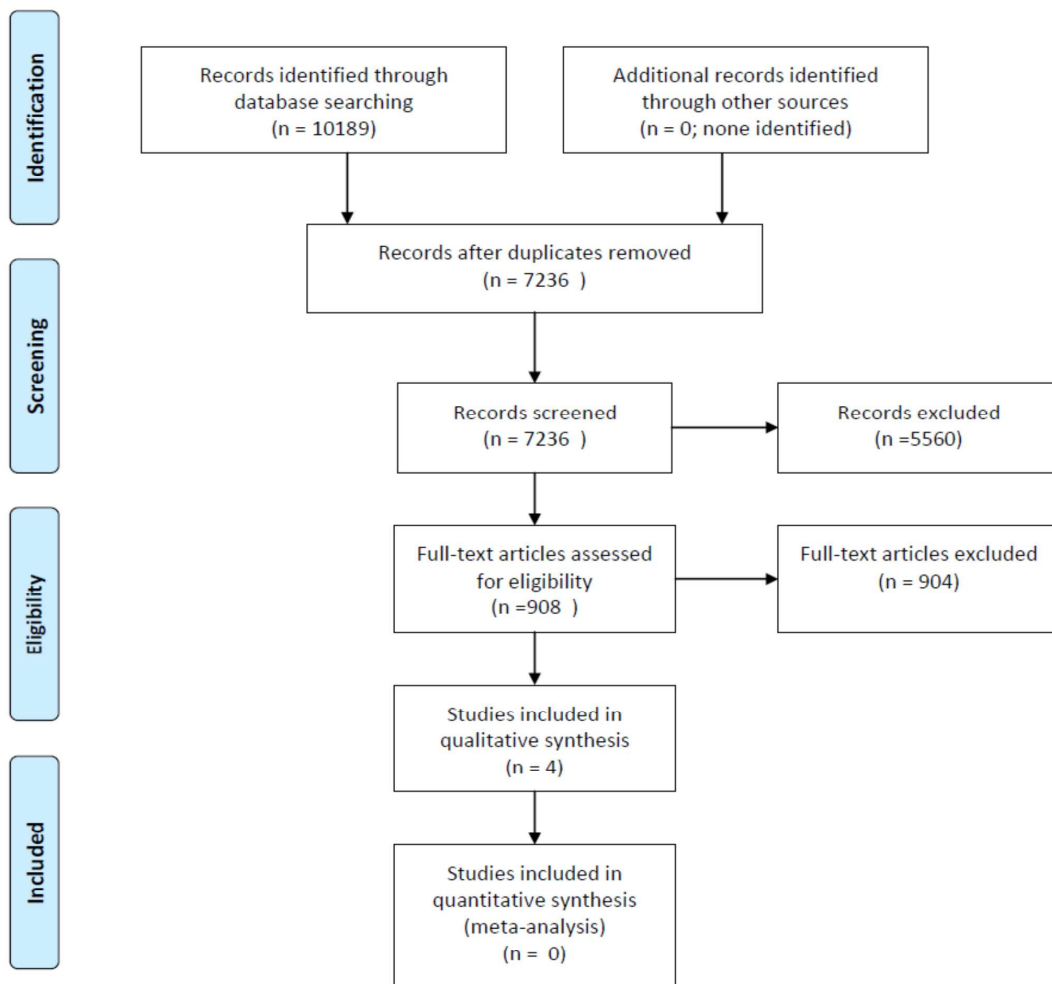

From: Moher D, Liberati A, Tetzlaff J, Altman DG, The PRISMA Group (2009). Preferred Reporting Items for Systematic Reviews and Meta-Analyses: The PRISMA Statement. PLoS Med 6(6): e1000097. doi:10.1371/journal.pmed1000097

For more information, visit [www.prisma-statement.org](http://www.prisma-statement.org).

## ACKNOWLEDGEMENTS

We would like to thank Ms. Aida Farha for her valuable help in designing the search strategy.

### Contributions of authors

Concept and design: EAA, LA, KB

Study selection: LA, LK, HN, HB, RF

Data collection: LA, LK

Data analysis and interpretation: EAA, LA, LK, HB, KB

Drafting of the manuscript: EAA, LA

All authors reviewed and approved the submitted version of the manuscript.

## DECLERATIONS OF INTEREST

None of the authors has conflicts of interest to declare.

## FUNDING

None.

### Figure legend:

Figure 1: study flow

## REFERENCE LIST

1. Tong KL, Lien CY. Do pharmaceutical representatives misuse their drug samples? Canadian family physician *Medecin de famille canadien* 1995;**41**:1363-6
2. DataMonitor. Personalized physician marketing: Using physician profiling to maximize returns. New York, NY; 2001.
3. Othman N, Vitry AI, Roughead EE, et al. Medicines information provided by pharmaceutical representatives: a comparative study in Australia and Malaysia. *BMC public health* 2010;**10**:743 doi: 10.1186/1471-2458-10-743[published Online First: Epub Date] | .
4. Dixon D, Takhar J, Macnab J, et al. Controlling quality in CME/CPD by measuring and illuminating bias. *The Journal of continuing education in the health professions* 2011;**31**(2):109-16 doi: 10.1002/chp.20114[published Online First: Epub Date] | .
5. Grande D. Limiting the influence of pharmaceutical industry gifts on physicians: self-regulation or government intervention? *Journal of general internal medicine* 2010;**25**(1):79-83 doi: 10.1007/s11606-009-1016-7[published Online First: Epub Date] | .
6. Roughead EE, Harvey KJ, Gilbert AL. Commercial detailing techniques used by pharmaceutical representatives to influence prescribing. *Australian and New Zealand journal of medicine* 1998;**28**(3):306-10
7. Silverman E. Everything you need to know about the Sunshine Act. *Bmj* 2013;**347**:f4704 doi: 10.1136/bmj.f4704[published Online First: Epub Date] | .
8. Carroll AE, Vreeman RC, Buddenbaum J, et al. To what extent do educational interventions impact medical trainees' attitudes and behaviors regarding industry-trainee and industry-physician relationships? *Pediatrics* 2007;**120**(6):e1528-35
9. Guyatt G, Oxman AD, Akl EA, et al. GRADE guidelines: 1. Introduction-GRADE evidence profiles and summary of findings tables. *Journal of clinical epidemiology* 2011;**64**(4):383-94 doi: 10.1016/j.jclinepi.2010.04.026[published Online First: Epub Date] | .
10. Boltri JM, Gordon ER, Vogel RL. Effect of antihypertensive samples on physician prescribing patterns. *Family medicine* 2002;**34**(10):729-31
11. Hartung DM, Evans D, Haxby DG, et al. Effect of drug sample removal on prescribing in a family practice clinic. *Annals of family medicine* 2010;**8**(5):402-9 doi: 10.1370/afm.1135[published Online First: Epub Date] | .
12. Spurling G, Mansfield P. General practitioners and pharmaceutical sales representatives: quality improvement research. *Quality & safety in health care* 2007;**16**(4):266-70 doi: 10.1136/qshc.2006.020164[published Online First: Epub Date] | .
13. Freemantle N, Johnson R, Dennis J, et al. Sleeping with the enemy? A randomized controlled trial of a collaborative health authority/industry intervention to influence prescribing practice. *British journal of clinical pharmacology* 2000;**49**(2):174-9
14. Wikipedia. NHS strategic health authority. Secondary NHS strategic health authority. [http://en.wikipedia.org/wiki/NHS\\_strategic\\_health\\_authority](http://en.wikipedia.org/wiki/NHS_strategic_health_authority).
15. Pauline Norris, Andrew Herxheimer, Joel Lexchin, Peter Mansfield. Drug Promotion – What We Know, What We Have Yet to Learn – Reviews of Materials in the WHO/HAI Database on Drug Promotion 2005 – EDM Research Series No. 032.
16. Wazana A. Physicians and the pharmaceutical industry: is a gift ever just a gift? *JAMA* 2000;**283**(3):373-80

1  
2  
3  
4  
5  
6  
7  
8 **APPENDICIES**

9  
10 **Appendix 1: Search strategy**

11  
12 **Medline**1946 to October Week 2 2012

- 13  
14 1. Conflict of Interest.mp.or "Conflict of Interest"/
- 15
- 16 2. Drug Industry/
- 17
- 18 3. Gift Giving/
- 19
- 20 4. detailman.mp.
- 21
- 22 5. commercial information.mp.
- 23
- 24 6. ((drug or pharma\*) adj3 (industry or firm\* or manufacture\* or compan\*)).mp.
- 25
- 26 7. physician\*.mp.
- 27
- 28 8. doctor\*.mp.
- 29
- 30 9. Physicians/
- 31
- 32 10. primary care.mp.
- 33
- 34 11. or/1-6
- 35
- 36 12. or/7-10
- 37
- 38 13. 11 and 12
- 39
- 40 14. 13 not (comment or editorial or letter).pt.
- 41  
42  
43  
44  
45  
46  
47  
48  
49  
50  
51  
52  
53  
54

Formatted: Font: Arial Narrow, 12 pt

Formatted: List Paragraph, Numbered +  
Level: 1 + Numbering Style: 1, 2, 3, ... +  
Start at: 1 + Alignment: Left + Aligned at:  
0.25" + Indent at: 0.5"

Formatted: Font: Arial Narrow, 12 pt

## EmBASE1980 to 2012 Week 41

1. Conflict of Interest.mp.or "Conflict of Interest"/
2. Drug Industry/
3. Gift Giving/
4. detailman.mp.
5. commercial information.mp.
6. ((drug or pharma\*) adj3 (industry or firm\* or manufacture\* or compan\*)).mp.
7. physician\*.mp.
8. doctor\*.mp.
9. Physician/
10. primary care.mp.
11. or/1-6
12. or/7-10
13. 11 and 12
14. 13 not (comment or editorial or letter).pt.

Formatted: List Paragraph, Numbered + Level: 1 + Numbering Style: 1, 2, 3, ... + Start at: 1 + Alignment: Left + Aligned at: 0.25" + Indent at: 0.5"



1  
2  
3  
4  
5  
6  
7  
8  
9  
10  
11  
12  
13  
14  
15  
16  
17  
18  
19  
20  
21  
22  
23  
24  
25  
26  
27  
28  
29  
30  
31  
32  
33  
34  
35  
36  
37  
38  
39  
40  
41  
42  
43  
44  
45  
46  
47  
48  
49  
50  
51  
52  
53  
54  
55  
56  
57  
58  
59  
60

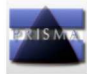

PRISMA 2009 Flow Diagram

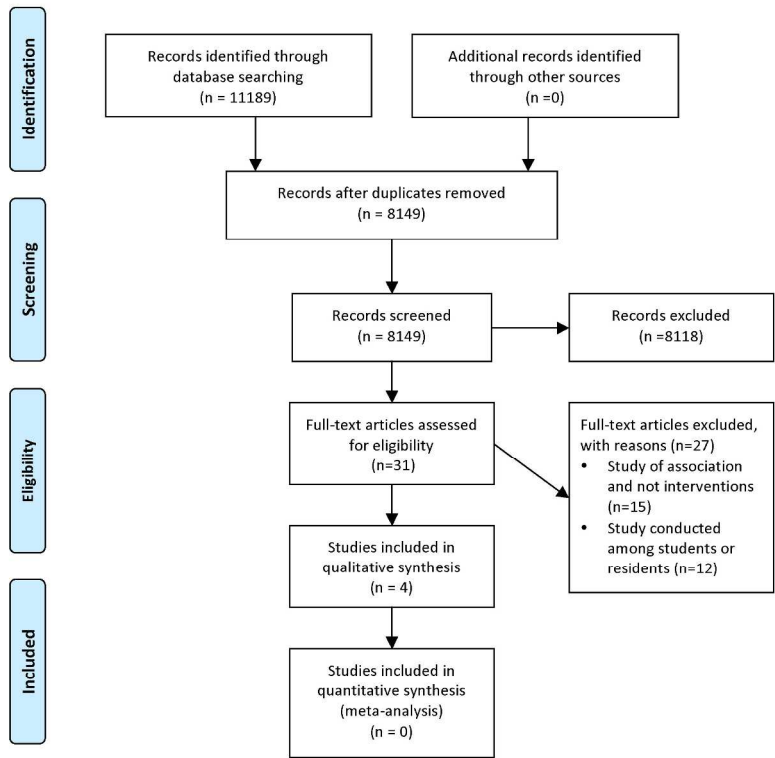

From: Moher D, Liberati A, Tetzlaff J, Altman DG, The PRISMA Group (2009). Preferred Reporting Items for Systematic Reviews and Meta-Analyses: The PRISMA Statement. PLoS Med 6(6): e1000097. doi:10.1371/journal.pmed1000097

For more information, visit [www.prisma-statement.org](http://www.prisma-statement.org).

Study flow  
215x279mm (300 x 300 DPI)

## APPENDICIES

### Appendix 1: Search strategy

Medline 1946 to October Week 2 2012

1. Conflict of Interest.mp.or "Conflict of Interest"/
2. Drug Industry/
3. Gift Giving/
4. detailman.mp.
5. commercial information.mp.
6. ((drug or pharma\*) adj3 (industry or firm\* or manufacture\* or compan\*)).mp.
7. physician\*.mp.
8. doctor\*.mp.
9. Physicians/
10. primary care.mp.
11. or/1-6
12. or/7-10
13. 11 and 12
14. 13 not (comment or editorial or letter).pt.

**EmBASE**1980 to 2012 Week 41

1. Conflict of Interest.mp.or "Conflict of Interest"/
2. Drug Industry/
3. Gift Giving/
4. detailman.mp.
5. commercial information.mp.
6. ((drug or pharma\*) adj3 (industry or firm\* or manufacture\* or compan\*)).mp.
7. physician\*.mp.
8. doctor\*.mp.
9. Physician/
10. primary care.mp.
11. or/1-6
12. or/7-10
13. 11 and 12
14. 13 not (comment or editorial or letter).pt.

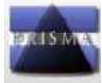

# PRISMA 2009 Checklist

1  
2  
3  
4  
5  
6  
7  
8  
9  
10  
11  
12  
13  
14  
15  
16  
17  
18  
19  
20  
21  
22  
23  
24  
25  
26  
27  
28  
29  
30  
31  
32  
33  
34  
35  
36  
37  
38  
39  
40  
41  
42  
43  
44  
45  
46  
47  
48  
49

| Section/topic                      | #  | Checklist item                                                                                                                                                                                                                                                                                              | Reported on page # |
|------------------------------------|----|-------------------------------------------------------------------------------------------------------------------------------------------------------------------------------------------------------------------------------------------------------------------------------------------------------------|--------------------|
| <b>TITLE</b>                       |    |                                                                                                                                                                                                                                                                                                             |                    |
| Title                              | 1  | Identify the report as a systematic review, meta-analysis, or both.                                                                                                                                                                                                                                         | 1                  |
| <b>ABSTRACT</b>                    |    |                                                                                                                                                                                                                                                                                                             |                    |
| Structured summary                 | 2  | Provide a structured summary including, as applicable: background; objectives; data sources; study eligibility criteria, participants, and interventions; study appraisal and synthesis methods; results; limitations; conclusions and implications of key findings; systematic review registration number. | 2                  |
| <b>INTRODUCTION</b>                |    |                                                                                                                                                                                                                                                                                                             |                    |
| Rationale                          | 3  | Describe the rationale for the review in the context of what is already known.                                                                                                                                                                                                                              | 3, 4               |
| Objectives                         | 4  | Provide an explicit statement of questions being addressed with reference to participants, interventions, comparisons, outcomes, and study design (PICOS).                                                                                                                                                  | 4                  |
| <b>METHODS</b>                     |    |                                                                                                                                                                                                                                                                                                             |                    |
| Protocol and registration          | 5  | Indicate if a review protocol exists, if and where it can be accessed (e.g., Web address), and, if available, provide registration information including registration number.                                                                                                                               | No                 |
| Eligibility criteria               | 6  | Specify study characteristics (e.g., PICOS, length of follow-up) and report characteristics (e.g., years considered, language, publication status) used as criteria for eligibility, giving rationale.                                                                                                      | 4, 5               |
| Information sources                | 7  | Describe all information sources (e.g., databases with dates of coverage, contact with study authors to identify additional studies) in the search and date last searched.                                                                                                                                  | 5                  |
| Search                             | 8  | Present full electronic search strategy for at least one database, including any limits used, such that it could be repeated.                                                                                                                                                                               | 5                  |
| Study selection                    | 9  | State the process for selecting studies (i.e., screening, eligibility, included in systematic review, and, if applicable, included in the meta-analysis).                                                                                                                                                   | 5, 6               |
| Data collection process            | 10 | Describe method of data extraction from reports (e.g., piloted forms, independently, in duplicate) and any processes for obtaining and confirming data from investigators.                                                                                                                                  | 6                  |
| Data items                         | 11 | List and define all variables for which data were sought (e.g., PICOS, funding sources) and any assumptions and simplifications made.                                                                                                                                                                       | 6                  |
| Risk of bias in individual studies | 12 | Describe methods used for assessing risk of bias of individual studies (including specification of whether this was done at the study or outcome level), and how this information is to be used in any data synthesis.                                                                                      | 6, 7               |
| Summary measures                   | 13 | State the principal summary measures (e.g., risk ratio, difference in means).                                                                                                                                                                                                                               | 7                  |
| Synthesis of results               | 14 | Describe the methods of handling data and combining results of studies, if done, including measures of consistency (e.g., $I^2$ for each meta-analysis).                                                                                                                                                    | 7                  |

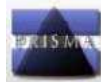

# PRISMA 2009 Checklist

Page 1 of 2

| Section/topic                 | #  | Checklist item                                                                                                                                                                                           | Reported on page # |
|-------------------------------|----|----------------------------------------------------------------------------------------------------------------------------------------------------------------------------------------------------------|--------------------|
| Risk of bias across studies   | 15 | Specify any assessment of risk of bias that may affect the cumulative evidence (e.g., publication bias, selective reporting within studies).                                                             | 7                  |
| Additional analyses           | 16 | Describe methods of additional analyses (e.g., sensitivity or subgroup analyses, meta-regression), if done, indicating which were pre-specified.                                                         | N/A                |
| <b>RESULTS</b>                |    |                                                                                                                                                                                                          |                    |
| Study selection               | 17 | Give numbers of studies screened, assessed for eligibility, and included in the review, with reasons for exclusions at each stage, ideally with a flow diagram.                                          | 7, 8               |
| Study characteristics         | 18 | For each study, present characteristics for which data were extracted (e.g., study size, PICOS, follow-up period) and provide the citations.                                                             | 8                  |
| Risk of bias within studies   | 19 | Present data on risk of bias of each study and, if available, any outcome level assessment (see item 12).                                                                                                | 8                  |
| Results of individual studies | 20 | For all outcomes considered (benefits or harms), present, for each study: (a) simple summary data for each intervention group (b) effect estimates and confidence intervals, ideally with a forest plot. | 9, 10              |
| Synthesis of results          | 21 | Present results of each meta-analysis done, including confidence intervals and measures of consistency.                                                                                                  | N/A                |
| Risk of bias across studies   | 22 | Present results of any assessment of risk of bias across studies (see Item 15).                                                                                                                          | 11                 |
| Additional analysis           | 23 | Give results of additional analyses, if done (e.g., sensitivity or subgroup analyses, meta-regression [see Item 16]).                                                                                    | N/A                |
| <b>DISCUSSION</b>             |    |                                                                                                                                                                                                          |                    |
| Summary of evidence           | 24 | Summarize the main findings including the strength of evidence for each main outcome; consider their relevance to key groups (e.g., healthcare providers, users, and policy makers).                     | 11                 |
| Limitations                   | 25 | Discuss limitations at study and outcome level (e.g., risk of bias), and at review-level (e.g., incomplete retrieval of identified research, reporting bias).                                            | 11, 12             |
| Conclusions                   | 26 | Provide a general interpretation of the results in the context of other evidence, and implications for future research.                                                                                  | 13, 14             |
| <b>FUNDING</b>                |    |                                                                                                                                                                                                          |                    |
| Funding                       | 27 | Describe sources of funding for the systematic review and other support (e.g., supply of data); role of funders for the systematic review.                                                               | 22                 |

From: Moher D, Liberati A, Tetzlaff J, Altman DG, The PRISMA Group (2009). Preferred Reporting Items for Systematic Reviews and Meta-Analyses: The PRISMA Statement. PLoS Med 6(6): e1000097. doi:10.1371/journal.pmed1000097

For more information, visit: [www.prisma-statement.org](http://www.prisma-statement.org).

Page 2 of 2

For peer review only - <http://bmjopen.bmj.com/site/about/guidelines.xhtml>
